# Supplementary material for: Solvent Replacement Strategies for Processing Pharmaceuticals and Bio-Related Compounds—A Review
Source: MDPI journal article supplement (doi:10.3390/liquids4020018), 2024-04-09
Supplement: s1 [file s1]

## **Supplementary Materials**

### **Solvent replacement strategies for processing pharmaceuticals and bio-related compounds - A Review**

Jia Lin Lee<sup>1</sup>, Gun Hean Chong<sup>\*1</sup>, Masaki Ota<sup>2,3</sup>, Haixin Guo<sup>4</sup>, Richard Lee Smith, Jr. <sup>\*2</sup>

<sup>1</sup> Faculty of Food Science and Technology, Universiti Putra Malaysia, 43400, Serdang, Selangor, Malaysia

<sup>2</sup> Graduate School of Environmental Studies, Tohoku University, Aramaki Aza Aoba, 468-1, Aoba-ku, Sendai, 980-8572, Japan

<sup>3</sup> Graduate School of Engineering, Tohoku University, Aramaki Aza Aoba, 6-6-11-403, Aoba-ku, Sendai, 980-8579, Japan

<sup>4</sup> Agro-Environmental Protection Institute, Ministry of Agriculture and Rural Affairs, No. 31 Fukang Road, Nankai District, Tianjin 300191, China

\* Corresponding authors

E-mail: [gunhean@upm.edu.my](mailto:gunhean@upm.edu.my), Tel: +6039679 8414;  
[richard.smith.c6@tohoku.ac.jp](mailto:richard.smith.c6@tohoku.ac.jp), Tel: +81-22-752-2278

**Table S1.** Water-soluble APIs solvated by monosolvents and their solvent polarity ( $E_T^N$ ), Kamlet-Taft acidity ( $\alpha$ ), basicity ( $\beta$ ) window, dipolarity/polarizability ( $\pi^*$ ) and corresponding literature. Solvents listed as hazardous in GSK solvent guide are highlighted in red.

| No | APIs  | Monosolvents                                                                                                   | $E_T^N$ | $\alpha$  | $\beta$    | $\pi^*$    | Refs      |
|----|-------|----------------------------------------------------------------------------------------------------------------|---------|-----------|------------|------------|-----------|
| 1  | 2-AA  | DMF DMSO ACN H2O                                                                                               | 0.39-1  | 0-1.17    | 0.4-0.76   | 0.66-1.09  | [1]       |
| 2  | 5-ASA | CCl4 THF EtOH MeOH H2O                                                                                         | 0.06-1  | 0-1.17    | 0.1-0.75   | 0.21-1.09  | [2-6]     |
| 3  | AA    | CHX DI Ace NMP DMAC DMF Sulfolane DMSO 2-BuOH IPA 1-BuOH 1-PrOH EtOH AcOH MeOH H2O                             | 0.02-1  | 0-1.17    | 0-0.9      | 0-1.09     | [7-9]     |
| 4  | ABT   | THF Ace ACN IPA 1-PrOH EtOH MeOH H2O                                                                           | 0.21-1  | 0-1.17    | 0.4-0.9    | 0.48-1.09  | [11]      |
| 5  | ABTA  | DI Ace ACN IPA 1-PrOH EtOH MeOH H2O                                                                            | 0.21-1  | 0-1.17    | 0.4-0.9    | 0.48-1.09  | [11]      |
| 6  | AG    | DI EF Ace ACN 2-BuOH sec-BuOH IPA 1-BuOH 1-PeOH 1-PrOH EtOH MeOH H2O                                           | 0.17-1  | 0-1.17    | 0.36-0.9   | 0.4-1.09   | [16]      |
| 7  | AS    | IPA EtOH PPG MeOH H2O                                                                                          | 0.55-1  | 0.62-1.17 | 0.47-0.84  | 0.48-1.09  | [20]      |
| 8  | BC    | EtAc 2-BuOH IPA 1-BuOH 1-PrOH EtOH PPG MeOH H2O                                                                | 0.23-1  | 0-1.17    | 0.45-0.9   | 0.4-1.09   | [22-25]   |
| 9  | BnA   | Hep Oc Pen CHX Decalin m o p-Xyl Tol TCM CHN DCM Ace DMAC DeOH EtAc DEG PAC EG H2O                             | 0.02-1  | 0-1.17    | -0.05-0.82 | -0.4-1.09  | [34-36]   |
| 10 | BSC   | Tol DI THF EtAc DEGEE Ace NMP DMAC DMF ACN IPA 1-BuOH 1-PrOH EtOH MeOH PEG H2O                                 | 0.1-1   | 0-1.17    | 0.11-0.9   | 0.4-1.09   | [38-39]   |
| 11 | BT    | DMSO IPA 1-BuOH 1-PeOH EtOH AcOH MeOH EG H2O                                                                   | 0.45-1  | 0-1.17    | 0-0.9      | 0.08-1.09  | [42-43]   |
| 12 | BZA   | m-Xyl EtAc BuAc MeAc Ace ACN 2-BuOH IPA 1-BuOH 1-PrOH EtOH MeOH H2O 2-EH                                       | 0.13-1  | 0-1.17    | 0.12-0.9   | 0.4-1.09   | [44]      |
| 13 | CETI  | Ace ACN IPA H2O                                                                                                | 0.36-1  | 0-1.17    | 0.4-0.84   | 0.48-1.09  | [53]      |
| 14 | DG    | Dc Oc CCl4 PrAc EtAc Ace NMP DMF ACN 2-BuOH NonOH 1-OcOH IPA MEA EtOH MeOH H2O                                 | 0.01-1  | 0-1.17    | 0-0.84     | -0.06-1.09 | [61-63]   |
| 15 | EPC   | Ace EtOH MeOH H2O                                                                                              | 0.36-1  | 0-1.17    | 0.47-0.77  | 0.54-1.09  | [67]      |
| 16 | ES    | Dc Oc p-Xyl DI THF EtAc TCM MTBE Ace DMF ACN 2-BuOH NonOH 1-OcOH IPA 1-BuOH 1-PeOH 1-PrOH MEA EtOH MeOH H2O    | 0.01-1  | 0-1.17    | 0-0.9      | -0.06-1.09 | [63, 68]  |
| 17 | FCZ   | Hex DI THF TCM 1-OcOH IPA EtOH MeOH H2O                                                                        | 0.01-1  | 0-1.17    | 0-0.84     | -0.11-1.09 | [77]      |
| 18 | FRR   | DI THF EtAc Ace ACN IPA 1-BuOH 1-PrOH EtOH MeOH H2O                                                            | 0.17-1  | 0-1.17    | 0.37-0.9   | 0.4-1.09   | [85]      |
| 19 | HA    | MeTHF EtAc DMK IPA 1-PrOH H2O CPME                                                                             | 0.18-1  | 0-1.17    | 0.45-0.9   | 0.45-1.09  | [88-89]   |
| 20 | HCA   | MeTHF EtAc H2O CPME LIM                                                                                        | 0.18-1  | 0-1.17    | 0.45-0.47  | 0.45-1.09  | [88-89]   |
| 21 | HCT   | Dc DI MeAc NMP DMF ACN 2-BuOH NonOH 1-OcOH 1-PeOH EtOH H2O LIM                                                 | 0.01-1  | 0-1.17    | 0-0.86     | 0.03-1.09  | [90-91]   |
| 22 | Hyap  | THF EtAc Ace DMF ACN 1-BuOH EtOH MeOH H2O                                                                      | 0.21-1  | 0-1.17    | 0.4-0.84   | 0.4-1.09   | [95]      |
| 23 | Hyp   | DI MeAc DCM MEK Ace ACN 2-BuOH sec-BuOH IPA 1-BuOH 1-PeOH 1-PrOH EtOH MeOH H2O                                 | 0.17-1  | 0-1.17    | 0.1-0.9    | 0.4-1.09   | [96-97]   |
| 24 | IBP   | Hex EtAc Ace DMF DMSO ACN 2-BuOH MeBuOH 1-OcOH IPA 1-BuOH MePrOH 1-PeOH 1-PrOH EtOH PPG MeOH EG H2O            | 0.01-1  | 0-1.17    | 0-0.9      | -0.11-1.09 | [99-102]  |
| 25 | ITR   | EtAc DEGEE DMSO IPA 1-BuOH EtOH PPG EG PEG H2O                                                                 | 0.23-1  | 0-1.17    | 0.45-0.84  | 0.4-1.09   | [110]     |
| 26 | KTCZ  | IPA EtOH PPG PEG H2O                                                                                           | 0.55-1  | 0.62-1.17 | 0.47-0.84  | 0.48-1.09  | [112-115] |
| 27 | L-Glu | DI Ace DMAC DMSO ACN NMA AM H2O                                                                                | 0.17-1  | 0-1.17    | 0.37-0.8   | 0.49-1.09  | [120-122] |
| 28 | LMHCl | DMSO 2-BuOH MeBuOH IPA 1-BuOH HeOH 1-PeOH 1-PrOH EtOH MeOH H2O                                                 | 0.45-1  | 0-1.17    | 0.47-0.9   | 0.4-1.09   | [123-124] |
| 29 | MLN   | IPA EtOH EG H2O                                                                                                | 0.55-1  | 0.76-1.17 | 0.47-0.84  | 0.48-1.09  | [129]     |
| 30 | NCD   | DMF IPA EtOH MeOH H2O                                                                                          | 0.39-1  | 0-1.17    | 0.47-0.84  | 0.48-1.09  | [136]     |
| 31 | OSM   | EtAc DEGEE DCM EtOH PPG PEG H2O                                                                                | 0.23-1  | 0-1.17    | 0.1-0.8    | 0.45-1.09  | [139]     |
| 32 | P     | Hex CHX Ben DI THF PrAc EtAc TCM EF DMAC DMF NFM DMSO ACN 2-BuOH 1-OcOH IPA 1-BuOH 1-PeOH 1-PrOH EtOH MeOH H2O | 0.01-1  | 0-1.17    | 0-0.9      | -0.11-1.09 | [140]     |

|    |        |                                                                                                                               |        |           |           |            |            |
|----|--------|-------------------------------------------------------------------------------------------------------------------------------|--------|-----------|-----------|------------|------------|
| 33 | PCM    | Hex CHX DI DEGEE TCM Ace NMP DMF NFM DMSO ACN 1-OcOH IPA 1-BuOH 1-PeOH 1-PrOH EtOH PPG MeOH PEG H2O                           | 0.01-1 | 0-1.17    | 0-0.9     | -0.11-1.09 | [140]      |
| 34 | PDM    | THF EtAc Ace DMF DMSO IPA EtOH MeOH H2O                                                                                       | 0.21-1 | 0-1.17    | 0.45-0.84 | 0.45-1.09  | [148]      |
| 35 | PSL    | Dc DI THF PrAc EtAc Ace NMP DMF ACN 2-BuOH NonOH 1-OcOH IPA 1-BuOH 1-PeOH 1-PrOH EtOH MeOH H2O                                | 0.01-1 | 0-1.17    | 0-0.9     | 0.03-1.09  | [90-91]    |
| 36 | PXM    | Dc Hep CHX CCl4 DI TCM Ace DMF DMSO ACN 2-BuOH NonOH MeBuOH 1-OcOH IPA 1-BuOH MePrOH 1-PrOH EtOH PPG MeOH EG PEG H2O          | 0.01-1 | 0-1.17    | 0-0.9     | -0.15-1.09 | [151]      |
| 37 | RA     | EtAc MeAc EtOH MeOH H2O                                                                                                       | 0.23-1 | 0-1.17    | 0.42-0.75 | 0.45-1.09  | [156-157]  |
| 38 | RBM    | EtAc Ace ACN IPA 1-BuOH 1-PrOH EtOH PPG MeOH PEG Gly H2O                                                                      | 0.23-1 | 0-1.21    | 0.4-0.9   | 0.4-1.09   | [123, 159] |
| 39 | SAM    | DBE DI THF PrAc EtAc BuAc MeAc Ace ACN 2-BuOH DeOH NonOH MeBuOH 1-OcOH IPA HepOH 1-BuOH HeOH 1-PeOH 1-PrOH EtOH AcOH MeOH H2O | 0.12-1 | 0-1.17    | 0.37-0.9  | 0.24-1.09  | [44]       |
| 40 | SCA    | DI EtAc EtOH MeOH PEG H2O                                                                                                     | 0.17-1 | 0-1.17    | 0.37-0.75 | 0.45-1.09  | [164]      |
| 41 | SMX    | Hep CHX DI DMF DMSO ACN 1-OcOH IPA 1-BuOH 1-PrOH EtOH MeOH H2O                                                                | 0.02-1 | 0-1.17    | 0-0.9     | -0.15-1.09 | [177]      |
| 42 | TFB    | IPA EtOH EG H2O                                                                                                               | 0.55-1 | 0.76-1.17 | 0.47-0.84 | 0.48-1.09  | [186]      |
| 43 | TMG    | H2O                                                                                                                           | 1-1    | 1.17-1.17 | 0.47-0.47 | 1.09-1.09  | [187]      |
| 44 | VE     | Dc Hep EtAc Ace EtOH H2O                                                                                                      | 0.01-1 | 0-1.17    | 0-0.77    | -0.15-1.09 | [190-192]  |
| 45 | WS·IPA | Ace IPA EtOH H2O                                                                                                              | 0.36-1 | 0-1.17    | 0.47-0.84 | 0.48-1.09  | [193]      |

**APIs abbreviation:** **2-AA:** 2-aminobenzoic acid; **5-ASA:** 5-Aminosalicic acid/Mesalazine; **AA:** Adipic acid; **ABT:** Abiraterone; **ABTA:** Abiraterone Acetate; **AG:** N-Acetylglycine; **AS:** Artesunate; **BC:** Baicalin; **BnA:** Benzoic acid; **BSC:** Bisacodyl; **BT:** betaine; **BZA:** Benzamide; **CETI:** Cetilistat; **DG:** Diosgenin; **EPC:** Epicatechin; **ES:** Estriol; **FCZ:** Fluconazole; **FRR:** 5-Fluorouracil; **HA:** p-hydroxybenzoic acid; **HCA:** Hydroxycinnamic acids; **HCT:** Hydrocortisone; **Hyap:** Hydroxyapatite; **Hyp:** L-Hydroxyproline; **IBP:** Ibuprofen; **ITR:** Itraconazole; **KTCZ:** Ketoconazole; **L-Glu:** L-glutamate; **LMHCl:** levamisole hydrochloride; **MLN:** Milrinone; **NCD:** Nicorandil; **OSM:** Osimertinib; **P:** Phenacetin; **PCM:** Paracetamol; **PDM:** Pomalidomide; **PSL:** Prednisolone; **PXM:** Piroxicam; **RA:** Rosmarinic acid; **RBM:** rebamipide; **SAM:** Salicylamide; **SCA:** Salicylic acid; **SMX:** sulfamethoxazole; **TFB:** Tirofiban; **TMG:** N-tetramethyl glycoluril; **VE:** Vitamin E; **WS·IPA:** warfarin sodium isopropanol.

**Solvents abbreviation:** **1-BuOH:** 1-butanol; **1-OcOH:** 1-octanol; **1-PeOH:** 1-pentanol; **1-PrOH:** 1-propanol; **2-BuOH:** 2-Butanol; **2-EH:** 2-Ethyl-1-hexanol; **Ace:** Acetone; **ACN:** Acetonitrile; **AcOH:** Acetic acid; **AM:** Acetamide; **Ben:** Benzene; **BuAc:** Buthyl acetate; **CCl<sub>4</sub>:** carbon tetrachloride; **CHN:** Cyclohexanone; **CHX:** Cyclohexane; **CPME:** Cyclopentyl methyl ether; **CPSC:** Capsaicin; **DBE:** Dibutyl ether; **Dc:** Dodecane; **DCM:** Dichloromethane; **Decalin:** Decahydronaphthalene; **DEG:** Diethylene glycol; **DEGEE:** diethylene glycol monoethyl ether /transcutol; **DeOH:** Decanol; **DI:** 1,4-dioxane; **DMAC:** N,N-Dimethylacetamide; **DMF:** Dimethylformamide; **DMK:** Dimethyl ketone/2-propanone; **DMSO:** Dimethyl sulfoxide; **EF:** Ethylene formate; **EG:** Ethylene glycol; **EtAc:** Ethyl acetate; **EtOH:** Ethanol; **Gly:** Glycerin; **H<sub>2</sub>O:** Water; **HeOH:** Hexanol; **Hep:** Heptane; **HepOH:** Heptanol; **Hex:** Hexane; **IPA:** 2-propanol/Isopropanol; **LIM:** Limonene; **MEA:** 2-Aminoethanol; **MeAc:** Methyl acetate; **MeBuOH:** 1-Methyl Butanol; **MEK:** 2-butanone; **MeOH:** methanol; **MePrOH:** 2-Methyl propanol/isobutanol; **MPC:** Morpholine-4-carbaldehyde; **MeTHF:** 2-Methyltetrahydrofuran; **MTBE:** Methyl tert-butyl ether; **m-Xyl:** m-xylene; **NFM:** N-Formylmorpholine; **NMA:** N-methylacetamide; **NMP:** N-methyl-2-pyrrolidone; **NonOH:** Nonanol; **Oc:** Octane; **o-Xyl:** o-xylene; **PAC:** Propanoic acid; **PEG:** Polyethylene glycol; **Pen:** Pentane; **PPG:** Propylene glycol; **PrAc:** Propyl acetate; **p-Xyl:** p-xylene; **sec-BuOH:** Sec-Butanol; **sulfolane:** sulfolane; **TCM:** Trichloromethane/chloroform; **THF:** Tetrahydrofuran; **Tol:** Toluene.

**Table S2.** Water-insoluble APIs solvated by monosolvents and their solvent polarity ( $E_T^N$ ), Kamlet-Taft acidity ( $\alpha$ ), basicity ( $\beta$ ) window, dipolarity/polarizability ( $\pi^*$ ) and corresponding literature. Solvents listed as hazardous in GSK solvent guide are highlighted in red.

| No | APIs  | Monosolvents                                                                                                | $E_T^N$   | $\alpha$  | $\beta$   | $\pi^*$    | Refs       |
|----|-------|-------------------------------------------------------------------------------------------------------------|-----------|-----------|-----------|------------|------------|
| 1  | ACF   | Tol EtAc DMK IPA EtOH MeOH                                                                                  | 0.1-0.77  | 0-0.98    | 0.11-0.84 | 0.45-0.62  | [12]       |
| 2  | AE    | IPA 1-BuOH EtOH MeOH                                                                                        | 0.55-0.77 | 0.76-0.98 | 0.66-0.84 | 0.4-0.6    | [13]       |
| 3  | AETH  | Hex 1-OcOH EtOH                                                                                             | 0.01-0.66 | 0-0.86    | 0-0.81    | -0.11-0.54 | [15]       |
| 4  | AZ    | EtAc 2-BuOH IPA 1-BuOH 1-PrOH EtOH MeOH                                                                     | 0.23-0.77 | 0-0.98    | 0.45-0.9  | 0.4-0.6    | [21]       |
| 5  | BENO  | Tol DI PrAc EtAc BuAc MeAc EF MEK Ace NMP DMAC DMF DMSO ACN 2-BuOH<br>IPA 1-BuOH 1-PrOH EtOH MeOH IPAc C5Ac | 0.1-0.77  | 0-0.98    | 0.1-0.9   | 0.4-1      | [26-28]    |
| 6  | BFL   | C5Ac PrAc EtAc BuAc MeAc 1-OcOH IPA HepOH 1-BuOH HexOH 1-PeOH EtOH<br>MeOH                                  | 0.21-0.77 | 0-0.98    | 0.4-0.86  | 0.4-0.6    | [29]       |
| 7  | BFNZ  | 1-OcOH EtOH                                                                                                 | 0.54-0.66 | 0.77-0.86 | 0.75-0.81 | 0.4-0.54   | [31]       |
| 8  | BP    | EtAc Ace ACN 1-PrOH EtOH MeOH                                                                               | 0.23-0.77 | 0-0.98    | 0.4-0.9   | 0.45-0.92  | [37]       |
| 9  | C16:1 | Dc Hex Hep TCIE EtAc MEK Ace IPA EtOH MeOH                                                                  | 0.01-0.77 | 0-0.98    | 0-0.84    | -0.15-0.92 | [45-49]    |
| 10 | CBZ   | EtAc MeAc TCM EG CHA                                                                                        | 0.23-0.8  | 0-0.9     | 0.1-0.52  | 0.45-0.92  | [50]       |
| 11 | CCM   | Hex Hep p-yl THF EtAc Ace DMSO ACN IPA 1-BuOH EtOH MeOH                                                     | 0.01-0.77 | 0-0.98    | 0-0.84    | -0.15-1    | [51]       |
| 12 | CTZ   | sulfolane ACN EtOH AcOH                                                                                     | 0.42-0.76 | 0-1.12    | 0.39-0.75 | 0.54-0.9   | [54]       |
| 13 | DA    | EtAc DEK Ace EtOH AcOH DEK                                                                                  | 0.23-0.76 | 0-1.12    | 0.45-0.77 | 0.45-0.92  | [55]       |
| 14 | DFP   | NMP IPA EtOH PPG PEG                                                                                        | 0.36-0.8  | 0.08-0.9  | 0.48-0.84 | 0.48-0.92  | [57-60]    |
| 15 | DPD   | CHX Tol DI EtAc CHN Ace NMP ACN 1-OcOH IPA 1-BuOH 1-PrOH EtOH MeOH                                          | 0.02-0.77 | 0-0.98    | 0-0.9     | 0-0.92     | [64-65]    |
| 16 | DPTS  | 2-BuOH IPA 1-BuOH 1-PrOH EtOH MeOH                                                                          | 0.51-0.77 | 0.69-0.98 | 0.66-0.9  | 0.4-0.6    | [66]       |
| 17 | ETD   | Tol C5Ac BuAc MeAc DCM Ace 2-BuOH IPA 1-BuOH 1-PrOH IamAc IBuAc                                             | 0.1-0.62  | 0-0.84    | 0-0.9     | 0.08-0.92  | [69-70]    |
| 18 | EZA   | DI PrAc EtAc BuAc MeAc EF MEK Ace DMF ACN IPA 1-BuOH 1-PeOH 1-PrOH<br>EtOH MeOH                             | 0.17-0.77 | 0-0.98    | 0.1-0.9   | 0.4-0.92   | [44]       |
| 19 | FBDZ  | DI EtAc Ace ACN IPA 1-BuOH 1-PrOH EtOH MeOH                                                                 | 0.17-0.77 | 0-0.98    | 0.37-0.9  | 0.4-0.92   | [73-74]    |
| 20 | FC    | Tol EtAc IPA EtOH MeOH                                                                                      | 0.1-0.77  | 0-0.98    | 0.11-0.84 | 0.45-0.6   | [75]       |
| 21 | FF    | Tol EtAc ACN IPA 1-PrOH EtOH MeOH                                                                           | 0.1-0.77  | 0-0.98    | 0.11-0.9  | 0.45-0.66  | [79]       |
| 22 | FFC   | THF MeBuOH IPA 1-BuOH MePrOH 1-PrOH EtOH PAC 2-EH                                                           | 0.21-0.75 | 0-1.12    | 0.45-0.9  | 0.4-0.58   | [81-82]    |
| 23 | GA    | NMP DMAC DMF sulfolane DMSO                                                                                 | 0.36-0.45 | 0-0.08    | 0.39-0.76 | 0.62-1     | [7, 9, 10] |
| 24 | GCV   | Tol EtAc Ace ACN IPA 1-BuOH 1-PrOH EtOH MeOH                                                                | 0.1-0.77  | 0-0.98    | 0.11-0.9  | 0.4-0.92   | [86]       |
| 25 | GSS   | Ace ACN MeOH                                                                                                | 0.36-0.77 | 0-0.98    | 0.4-0.77  | 0.6-0.92   | [87]       |
| 26 | IBA   | THF MeAc TCM CHN CPN EF MEK Ace ACN 2-BuOH IPA 1-BuOH 1-PrOH EtOH<br>MeOH                                   | 0.21-0.77 | 0-0.98    | 0.1-0.9   | 0.4-0.92   | [98]       |
| 27 | Ibr   | EtAc MTBE MEK Ace ACN IPA 1-BuOH                                                                            | 0.23-0.56 | 0-0.79    | 0.1-0.84  | 0.4-0.92   | [103-104]  |
| 28 | IMA   | Tol THF EtAc MeAc Ace ACN 2-BuOH IPA 1-BuOH 1-PrOH EtOH MeOH                                                | 0.1-0.77  | 0-0.98    | 0.11-0.9  | 0.4-0.92   | [105-106]  |
| 29 | IMC   | EtAc DCM Ace ACN EtOH MeOH                                                                                  | 0.23-0.77 | 0-0.98    | 0.1-0.77  | 0.45-0.92  | [107-109]  |

|    |         |                                                                                 |           |          |           |            |           |
|----|---------|---------------------------------------------------------------------------------|-----------|----------|-----------|------------|-----------|
| 30 | MBQ-167 | EtAc ACN 2-BuOH IPA 1-BuOH 1-PrOH EtOH MeOH                                     | 0.23-0.77 | 0-0.98   | 0.4-0.9   | 0.4-0.66   | [126]     |
| 31 | MCHCl   | EtAc ACN IPA 1-PrOH EtOH MeOH                                                   | 0.23-0.77 | 0-0.98   | 0.4-0.9   | 0.45-0.66  | [127]     |
| 32 | MTT     | EtAc IPA EtOH MeOH                                                              | 0.23-0.77 | 0-0.98   | 0.45-0.84 | 0.45-0.6   | [130]     |
| 33 | NAP     | TCM CHN 1-OcOH                                                                  | 0.26-0.54 | 0-0.77   | 0.1-0.81  | 0.4-0.68   | [131]     |
| 34 | NFA     | Hex Hep CHX Ben DI EtAc TCM 1-OcOH EtOH                                         | 0.01-0.66 | 0-0.86   | 0-0.81    | -0.15-0.58 | [137-138] |
| 35 | PA      | Hex Hep TCIE Ace IPA 1-PrOH EtOH                                                | 0.01-0.66 | 0-0.86   | 0-0.9     | -0.15-0.92 | [141-143] |
| 36 | PHT     | NMP EtOH BEG PPG MeOH Gly CD                                                    | 0.36-0.82 | 0-1.21   | 0.45-0.8  | 0.49-0.9   | [153-154] |
| 37 | PTBA    | Hex Tol 1-OcOH IPA EtOH AcOH MeOH PTBT MTBB                                     | 0.01-0.77 | 0-1.12   | 0-0.84    | -0.11-0.64 | [149]     |
| 38 | RP      | Tol EtAc Ace IPA 1-BuOH 1-PrOH EtOH MeOH CUM                                    | 0.1-0.77  | 0-0.98   | 0.11-0.9  | 0.4-0.92   | [76, 156] |
| 39 | SA      | EtAc NMP DMAC DMF sulfolane DMSO ACN EtOH                                       | 0.23-0.66 | 0-0.86   | 0.39-0.76 | 0.45-1     | [7]       |
| 40 | SFD     | TCM Ace IPA 1-PrOH EtOH MeOH                                                    | 0.26-0.77 | 0-0.98   | 0.1-0.9   | 0.48-0.92  | [167]     |
| 41 | SFT     | TCM EDC MEK Ace ACN IPA 1-BuOH 1-PrOH MeOH                                      | 0.26-0.77 | 0-0.98   | 0.1-0.9   | 0.4-0.92   | [176]     |
| 42 | SQ      | Ace ACN                                                                         | 0.36-0.46 | 0-0.19   | 0.4-0.77  | 0.66-0.92  | [180]     |
| 43 | TAZ     | Hex DI EtAc BuAc MeAc EF MEK DEF Ace NMP BL ACN 1-OcOH IPA 1-PrOH EtOH PPG MeOH | 0.01-0.77 | 0-0.98   | 0-0.9     | -0.11-0.92 | [181-182] |
| 44 | TF      | EtAc Ace IPA 1-PrOH EtOH MeOH                                                   | 0.23-0.77 | 0-0.98   | 0.45-0.9  | 0.45-0.92  | [185]     |
| 45 | TMP     | EtAc MeAc Ace ACN IPA 1-BuOH 1-PrOH EtOH MeOH                                   | 0.23-0.77 | 0-0.98   | 0.4-0.9   | 0.4-0.92   | [188]     |
| 46 | TZD     | Hex 1-OcOH 1-PrOH EtOH MeOH                                                     | 0.01-0.77 | 0-0.98   | 0-0.9     | -0.11-0.6  | [189]     |
| 47 | Xarelto | TCM IPA 1-BuOH EtOH MeOH                                                        | 0.26-0.77 | 0.2-0.98 | 0.1-0.84  | 0.4-0.6    | [194]     |

**APIs abbreviation:** ACF: Aceclofenac; AE: Androstenedione; AETH: 6-(acetylamino)-N-(5-ethyl-1,3,4-thiadiazol-2-yl) hexanamide; AZ: Azoxystrobin; BENO: Benorilate; BFL: Benflumetol; BFNZ: Bifonazole; BP: Butyl Paraben; C16:1: Stearic acid; CBZ: Carbamazepine; CCM: Curcumin; CTZ: Cetirizine Hydrochloride; DA: Decanedioic acid; DFP: Deferiprone; DPD: Dipyridamole; DPTS: Dipyridamole p-toluene sulfonate; ETD: Etodolac; EZA: Ethenzamide; FBDZ: Fenbendazole; FC: Fenoxycarb; FF: Fenofibrate; FFC: Florfenicol; GA: Glutaric acid; GCV: Ganciclovir; GSS: Ginsenoside; IBA: Isobutyramide; Ibr: Ibrutinib; IMA: Imatinib mesylate; IMC: INDOMETHACIN; MBQ-167: 9-ethyl-3-(5-phenyl-1H-1,2,3-triazol-3-yl)-9H-carbazole ; MCHCl: Minocycline hydrochloride; MTT: Macitentan; NAP: Naproxen; NFA: Niflumic acid; PA: Palmitic acid; PHT: Phenytoin; PTBA: Para-tert-butylbenzoic acid; RP: Risperidone; SA: Succinic acid; SFD: Sulfadiazine; SFT: Sulfamethazine; SQ: Squalene; TAZ: 1,2,4-Triazole; TF:  $\beta$ -tegafur; TMP: Tetramethylpyrazine; TZD: Thiazolidine-2,4-dione ; Xarelto: Rivaroxaban.

**Solvents abbreviation:** 1-BuOH: 1-butanol; 1-OcOH: 1-octanol; 1-PeOH: 1-pentanol; 1-PrOH: 1-propanol; 2-BuOH: 2-Butanol; 2-EH: 2-Ethyl-1-hexanol; Ace: Acetone; ACN: Acetonitrile; AcOH: Acetic acid; BEG: 1,3-Butandiol/ butylene glycol; Ben: Benzene; BL: 1,4-Butyrolactone; BuAc: Butyl acetate; C5Ac: Pentyl acetate; CD:  $\beta$ -Cyclodextrin; CHA: Cyclohexylamine; CHeOH: Cyclohexanol; CHN: Cyclohexanone; CHX: Cyclohexane; CPN: Cyclopentanone; CUM: Cumene; Dc: Dodecane; DCM: Dichloromethane; Decalin: Decahydronaphthalene; DEF: N,N-diethylformamide ; DEK: 3-Pentanone; DI: 1,4-dioxane; DMAC: N,N-Dimethylacetamide; DMF: Dimethylformamide; DMK: Dimethyl ketone/2-propanone; DMSO: Dimethyl sulfoxide; EDC: 1,2-Dichloroethane/ ethylene dichloride; EF: Ethylene formate; EG: Ethylene glycol; EtAc: Ethyl acetate; EtOH: Ethanol; Gly: Glycerin; HeOH: Hexanol; Hep: Heptane; HepOH: Heptanol; Hex: Hexane; IAmAc: Isoamyl acetate; IBuAc: Isobutyl acetate; IPA: 2-propanol/Isopropanol; IPAc: Isopropyl acetate; MeAc: Methyl acetate; MeBuOH: 1-Methyl Butanol; MEK: 2-butanone; MeOH: methanol; MePrOH: 2-Methyl propanol/isobutanol; MTBB: methyl-4-tert-butylbenzoate ; MTBE: Methyl tert-butyl ether; NMP: N-methyl-2-pyrrolidone; PAC: Propanoic acid; PPG: Propylene

glycol; **PrAc**: Propyl acetate; **PTBT**: Para-tert-butyltoluene; **p-Xyl**: p-xylene; **sulfolane**: sulfolane; **TCIE**: Trichloroethylene; **TCM**: Trichloromethane/chloroform; **THF**: Tetrahydrofuran; **Tol**: Toluene.

## References

- [1] S. Imran, A. Hossain, K. Mahali, P.S. Guin, A. Datta, S. Roy, Solubility and peculiar thermodynamical behaviour of 2-aminobenzoic acid in aqueous binary solvent mixtures at 288.15 to 308.15 K, *Journal of Molecular Liquids* 302 (2020) 112566.  
<https://doi.org/10.1016/j.molliq.2020.112566>
- [2] A. Patel, A. Vaghasiya, R. Gajera, S. Baluja, Solubility of 5-Amino Salicylic Acid in Different Solvents at Various Temperatures, *Journal of Chemical & Engineering Data* 55 (2010) 1453-1455. <https://doi.org/10.1021/jc900646u>
- [3] M. Moradi, E. Mazaher Haji Agha, S. Hemmati, F. Martinez, M. Kuentz, A. Jouyban, Solubility of 5-aminosalicylic acid in {N-methyl-2-pyrrolidone + ethanol} mixtures at T = (293.2 to 313.2) K, *Journal of Molecular Liquids* 306 (2020) 112774.  
<https://doi.org/10.1016/j.molliq.2020.112774>
- [4] K. Jouyban, E. Mazaher Haji Agha, S. Hemmati, F. Martinez, M. Kuentz, A. Jouyban, Solubility of 5-aminosalicylic acid in N-methyl-2-pyrrolidone + water mixtures at various temperatures, *Journal of Molecular Liquids* 310 (2020) 113143.  
<https://doi.org/10.1016/j.molliq.2020.113143>
- [5] S. Alvani-Alamdari, H. Rezaei, E. Rahimpour, S. Hemmati, F. Martinez, M. Barzegar-Jalali, A. Jouyban, Mesalazine solubility in the binary mixtures of ethanol and water at various temperatures, *Physics and Chemistry of Liquids* 59 (2019) 12-25.  
<https://doi.org/10.1080/00319104.2019.1675157>
- [6] V. Jouyban-Gharamaleki, A. Jouyban, M. Kuentz, S. Hemmati, F. Martinez, E. Rahimpour, A laser monitoring technique for determination of mesalazine solubility in propylene glycol and ethanol mixtures at various temperatures, *Journal of Molecular Liquids* 304 (2020) 112714.  
<https://doi.org/10.1016/j.molliq.2020.112714>
- [7] S. Shi, M. Yan, B. Tao, W. Luo, Measurement and correlation for solubilities of succinic acid, glutaric acid and adipic acid in five organic solvents, *Journal of Molecular Liquids* 297 (2020) 111735. <https://doi.org/10.1016/j.molliq.2019.111735>
- [8] B. Shen, Q. Wang, Y. Wang, X. Ye, F. Lei, X. Gong, Solubilities of Adipic Acid in Acetic Acid + Water Mixtures and Acetic Acid + Cyclohexane Mixtures, *Journal of Chemical & Engineering Data* 58 (2013) 938-942. <https://doi.org/10.1021/jc301202v>
- [9] Y. Li, Y. Wang, Z. Ning, J. Cui, Q. Wu, X. Wang, Solubilities of Adipic Acid and Succinic Acid in a Glutaric Acid + Acetone or N-Butanol Mixture, *Journal of Chemical & Engineering Data* 59 (2014) 4062-4069. <https://doi.org/10.1021/jc500682v>
- [10] M. Yan, X. Li, B. Tao, L. Yang, W. Luo, Solubility of succinic acid, glutaric acid and adipic acid in propionic acid +  $\epsilon$ -caprolactone mixtures and propionic acid + cyclohexanone mixtures: Experimental measurement and thermodynamic modeling, *Journal of Molecular Liquids* 272 (2018) 106-119. <https://doi.org/10.1016/j.molliq.2018.09.076>
- [11] T. Solymosi, F. Tóth, J. Orosz, O. Basa-Dénes, R. Angi, T. Jordán, Z. Ötvös, H. Glavinas, Solubility Measurements at 296 and 310 K and Physicochemical Characterization of Abiraterone and Abiraterone Acetate, *Journal of Chemical & Engineering Data* (2018).  
<https://doi.org/10.1021/acs.jced.8b00566>
- [12] J.-Q. Liu, Y. Wang, H. Tang, S. Wu, Y.-Y. Li, L.-Y. Zhang, Q.-Y. Bai, X. Liu, Experimental Measurements and Modeling of the Solubility of Aceclofenac in Six Pure Solvents from (293.35 to 338.25) K, *Journal of Chemical & Engineering Data* 59 (2014) 1588-1592.  
<https://doi.org/10.1021/jc500038u>
- [13] W. Tang, C. Xie, Z. Wang, S. Wu, Y. Feng, X. Wang, J. Wang, J. Gong, Solubility of

androstenedione in lower alcohols, *Fluid Phase Equilibria* 363 (2014) 86-96.

<https://doi.org/10.1016/j.fluid.2013.11.008>

[14] W. Tang, Z. Wang, Y. Feng, C. Xie, J. Wang, C. Yang, J. Gong, Experimental Determination and Computational Prediction of Androstenedione Solubility in Alcohol + Water Mixtures, *Industrial & Engineering Chemistry Research* 53 (2014) 11538-11549.

<https://doi.org/10.1021/ie501221x>

[15] A. Sharapova, M. Ol'khovich, S. Blokhina, G. Perlovich, Solubility and vapor pressure data of bioactive 6-(acetylamino)-N-(5-ethyl-1,3,4-thiadiazol-2-yl) hexanamide, *The Journal of Chemical Thermodynamics* 135 (2019) 35-44. <https://doi.org/10.1016/j.jct.2019.03.015>

[16] S. Guo, W. Yang, Y. Hu, K. Wang, Y. Luan, Measurement and Correlation of the Solubility of N-Acetylglycine in Different Solvents at Temperatures from 278.15 to 319.15 K, *Journal of Solution Chemistry* 42 (2013) 1879-1887. <https://doi.org/10.1007/s10953-013-0074-y>

[17] Y. Guo, H. He, H. Huang, J. Qiu, J. Han, S. Hu, H. Liu, Y. Zhao, P. Wang, Solubility Determination and Thermodynamic Modeling of N-Acetylglycine in Different Solvent Systems, *Journal of Chemical & Engineering Data* 66 (2021) 1344-1355.

<https://doi.org/10.1021/acs.jced.0c00983>

[18] S. Wu, Y. Shi, H. Zhang, Solubility Measurement and Correlation for Amrinone in Four Binary Solvent Systems at 278.15–323.15 K, *Journal of Chemical & Engineering Data* 65 (2020) 4108-4115. <https://doi.org/10.1021/acs.jced.0c00393>

[19] D. Shao, Z. Yang, G. Zhou, J. Chen, S. Zheng, X. Lv, R. Li, Improving the solubility of acipimox by cosolvents and the study of thermodynamic properties on solvation process, *Journal of Molecular Liquids* 262 (2018) 389-395. <https://doi.org/10.1016/j.molliq.2018.04.009>

[20] R. Xu, T. Han, L. Shen, J. Zhao, X.a. Lu, Solubility Determination and Modeling for Artesunate in Binary Solvent Mixtures of Methanol, Ethanol, Isopropanol, and Propylene Glycol + Water, *Journal of Chemical & Engineering Data* 64 (2019) 755-762.

<https://doi.org/10.1021/acs.jced.8b00988>

[21] H. Yang, T. Zhang, S. Xu, D. Han, S. Liu, Y. Yang, S. Du, M. Li, J. Gong, Measurement and Correlation of the Solubility of Azoxystrobin in Seven Monosolvents and Two Different Binary Mixed Solvents, *Journal of Chemical & Engineering Data* 62 (2017) 3967-3980.

<https://doi.org/10.1021/acs.jced.7b00669>

[22] J. Wu, L. Gu, H. Wang, L. Tao, X. Wang, Solubility of Baicalein in Different Solvents from (287 to 323) K, *International Journal of Thermophysics* 35 (2014) 1465-1475.

<https://doi.org/10.1007/s10765-014-1740-z>

[23] H. Wang, G. Yao, H. Zhang, Measurement and Correlation of the Solubility of Baicalin in Several Mixed Solvents, *Journal of Chemical & Engineering Data* 64 (2019) 1281-1287.

<https://doi.org/10.1021/acs.jced.8b01186>

[24] Q. He, M. Zheng, H. Zhao, Baicalin solubility in aqueous co-solvent mixtures of methanol, ethanol, isopropanol and N-propanol revisited: solvent–solvent and solvent–solute interactions and IKBI preferential solvation analysis, *Physics and Chemistry of Liquids* 58 (2019) 820-832.

<https://doi.org/10.1080/00319104.2019.1660981>

[25] F. Mo, J. Ma, P. Zhang, D. Zhang, H. Fan, X. Yang, L. Zhi, J. Zhang, Solubility and thermodynamic properties of baicalein in water and ethanol mixtures from 283.15 to 328.15 K, *Chemical Engineering Communications* 208 (2019) 183-196.

<https://doi.org/10.1080/00986445.2019.1700116>

[26] W. Hu, Z. Shang, N. Wei, B. Hou, J. Gong, Y. Wang, Solubility of benorilate in twelve monosolvents: Determination, correlation and COSMO-RS analysis, *The Journal of Chemical*



Thermodynamics 152 (2021) 106272. <https://doi.org/10.1016/j.jct.2020.106272>

[27] Y. Wu, M. Ren, X. Zhang, Solubility Determination and Model Correlation of Benorilate between  $T = 278.18$  and  $318.15$  K, Journal of Chemical & Engineering Data 65 (2020) 3690-3695. <https://doi.org/10.1021/acs.jced.0c00301>

[28] J. Sha, T. Ma, Z. Huang, X. Hu, R. Zhang, Z. Cao, Y. Wan, R. Sun, H. He, G. Jiang, Y. Li, T. Li, B. Ren, Corrigendum to “Solubility determination, model evaluation, Hansen solubility parameter and thermodynamic properties of benorilate in six pure solvents and two binary solvent mixtures” [J. Chem. Thermodyn. 153 (2021) 106301], The Journal of Chemical Thermodynamics 158 (2021) 106365. <https://doi.org/10.1016/j.jct.2020.106365>

[29] J. Sha, X. Yang, X. Hu, Z. Huang, Z. Cao, Y. Wan, R. Sun, G. Jiang, H. He, Y. Li, T. Li, B. Ren, Solubility determination, model evaluation, Hansen solubility parameter and thermodynamic properties of benflumetol in pure alcohol and ester solvents, The Journal of Chemical Thermodynamics 154 (2021) 106323. <https://doi.org/10.1016/j.jct.2020.106323>

[30] J. Sha, X. Yang, L. Ji, Z. Cao, H. Niu, Y. Wan, R. Sun, H. He, G. Jiang, Y. Li, T. Li, B. Ren, Solubility determination, model evaluation, Hansen solubility parameter, molecular simulation and thermodynamic properties of benflumetol in four binary solvent mixtures from  $278.15$  K to  $323.15$  K, Journal of Molecular Liquids 333 (2021) 115867. <https://doi.org/10.1016/j.molliq.2021.115867>

[31] U. Domańska, A. Pobudkowska, A. Pelczarska, M. Winiarska-Tusznio, P. Gierycz, Solubility and pKa of select pharmaceuticals in water, ethanol, and 1-octanol, The Journal of Chemical Thermodynamics 42 (2010) 1465-1472. <https://doi.org/10.1016/j.jct.2010.07.001>

[32] J. Zhang, C. Huang, R. Xu, Solubility of Bifonazole in Four Binary Solvent Mixtures: Experimental Measurement and Thermodynamic Modeling, Journal of Chemical & Engineering Data 64 (2019) 2641-2648. <https://doi.org/10.1021/acs.jced.9b00097>

[33] W. Li, J. Yuan, X. Wang, W. Shi, H. Zhao, R. Xing, A. Jouyban, W.E. Acree, Bifonazole dissolved in numerous aqueous alcohol mixtures: Solvent effect, enthalpy–entropy compensation, extended Hildebrand solubility parameter approach and preferential solvation, Journal of Molecular Liquids 338 (2021) 116671. <https://doi.org/10.1016/j.molliq.2021.116671>

[34] J. Thati, F.L. Nordström, Å.C. Rasmuson, Solubility of Benzoic Acid in Pure Solvents and Binary Mixtures, Journal of Chemical & Engineering Data 55 (2010) 5124-5127. <https://doi.org/10.1021/jel100675r>

[35] Z. Wang, Z. Xu, X. Xu, A. Yang, W. Luo, Y. Luo, Solubility of benzoic acid in twelve organic solvents: Experimental measurement and thermodynamic modeling, The Journal of Chemical Thermodynamics 150 (2020) 106234. <https://doi.org/10.1016/j.jct.2020.106234>

[36] X. Zhang, J. Chen, J. Hu, M. Liu, Z. Cai, Y. Xu, B. Sun, The solubilities of benzoic acid and its nitro-derivatives, 3-nitro and 3,5-dinitrobenzoic acids, Journal of Chemical Research 45 (2021) 1100-1106. <https://doi.org/10.1177/17475198211058617>

[37] H. Yang, Å.C. Rasmuson, Solubility of Butyl Paraben in Methanol, Ethanol, Propanol, Ethyl Acetate, Acetone, and Acetonitrile, Journal of Chemical & Engineering Data 55 (2010) 5091-5093. <https://doi.org/10.1021/jel1006289>

[38] Y. Wu, C. Wu, S. Yan, B. Hu, Solubility of Bisacodyl in Pure Solvent at Various Temperatures: Data Correlation and Thermodynamic Property Analysis, Journal of Chemical & Engineering Data 65 (2019) 43-48. <https://doi.org/10.1021/acs.jced.9b00728>

[39] S.-K. Lee, W.-Y. Sim, E.-S. Ha, H. Park, J.-S. Kim, J.-S. Jeong, M.-S. Kim, Solubility of bisacodyl in fourteen mono solvents and N-methyl-2-pyrrolidone + water mixed solvents at different temperatures, and its application for nanosuspension formation using liquid antisolvent

precipitation, *Journal of Molecular Liquids* 310 (2020) 113264.

<https://doi.org/10.1016/j.molliq.2020.113264>

[40] S. Sajedi-Amin, M. Barzegar-Jalali, A. Fathi-Azarbayjani, A. Kebriaeezadeh, F. Martínez, A. Jouyban, Solubilization of bosentan using ethanol as a pharmaceutical cosolvent, *Journal of Molecular Liquids* 232 (2017) 152-158. <https://doi.org/10.1016/j.molliq.2017.02.056>

[41] M. Barzegar-Jalali, S.N. Mirheydari, E. Rahimpour, H. Shekaari, F. Martinez, A. Jouyban, Experimental determination and correlation of bosentan solubility in (PEG 200 + water) mixtures at  $T = (293.15-313.15)$  K, *Physics and Chemistry of Liquids* 57 (2018) 504-515. <https://doi.org/10.1080/00319104.2018.1491574>

[42] S. Wang, Y. Zhang, J. Wang, Solubility Measurement and Modeling for Betaine in Different Pure Solvents, *Journal of Chemical & Engineering Data* 59 (2014) 2511-2516. <https://doi.org/10.1021/je500267w>

[43] S. Wang, L. Qin, Z. Zhou, J. Wang, Solubility and Solution Thermodynamics of Betaine in Different Pure Solvents and Binary Mixtures, *Journal of Chemical & Engineering Data* 57 (2012) 2128-2135. <https://doi.org/10.1021/je2011659>

[44] M. Przybyłek, A. Miernicka, M. Nowak, P. Cysewski, New Screening Protocol for Effective Green Solvents Selection of Benzamide, Salicylamide and Ethenzamide, *Molecules* 27 (2022) 3323. <https://doi.org/10.3390/molecules27103323>

[45] B. Calvo, E.A. Cepeda, Solubilities of Stearic Acid in Organic Solvents and in Azeotropic Solvent Mixtures, *Journal of Chemical & Engineering Data* 53 (2008) 628-633. <https://doi.org/10.1021/je7006567>

[46] M. Mirmehrabi, S. Rohani, Measurement and Prediction of the Solubility of Stearic Acid Polymorphs by the UNIQUAC Equation, *The Canadian Journal of Chemical Engineering* 82 (2004) 335-342. <https://doi.org/10.1002/cjce.5450820214>

[47] R. Heryanto, M. Hasan, E.C. Abdullah, A.C. Kumoro, *ScienceAsia* 33 (2007) 469. [https://www.scienceasia.org/2007.33.n4/v33\\_469\\_472.pdf](https://www.scienceasia.org/2007.33.n4/v33_469_472.pdf)

[48] A. Noubigh, Stearic acid solubility in mixed solvents of (water + ethanol) and (ethanol + ethyl acetate): Experimental data and comparison among different thermodynamic models, *Journal of Molecular Liquids* 296 (2019) 112101. <https://doi.org/10.1016/j.molliq.2019.112101>

[49] A. Jouyban, E. Mazaher Haji Agha, E. Rahimpour, W.E. Acree Jr, Further computation and some comments on “Stearic acid solubility in mixed solvents of (water + ethanol) and (ethanol + ethyl acetate): Experimental data and comparison among different thermodynamic models”, *Journal of Molecular Liquids* 310 (2020) 113228. <https://doi.org/10.1016/j.molliq.2020.113228>

[50] W. Liu, Z. Bao, Y. Shen, T. Yao, H. Bai, X. Jin, Solubility measurement and thermodynamic modeling of carbamazepine (form III) in five pure solvents at various temperatures, *Chinese Journal of Chemical Engineering* 33 (2021) 231-235. <https://doi.org/10.1016/j.cjche.2020.09.054>

[51] Z. Cui, L. Yao, J. Ye, Z. Wang, Y. Hu, Solubility measurement and thermodynamic modelling of curcumin in twelve pure solvents and three binary solvents at different temperature ( $T = 278.15-323.15$  K), *Journal of Molecular Liquids* 338 (2021) 116795. <https://doi.org/10.1016/j.molliq.2021.116795>

[52] L. Lin, K. Zhao, B. Yu, H. Wang, M. Chen, J. Gong, Measurement and Correlation of Solubility of Cefathiamidine in Water + (Acetone, Ethanol, or 2-Propanol) from (278.15 to 308.15) K, *Journal of Chemical & Engineering Data* 61 (2015) 412-419. <https://doi.org/10.1021/acs.jced.5b00617>

[53] X. Li, M. Ma, C. Du, H. Zhao, Solubility of cetilistat in neat solvents and preferential solvation in (acetone, isopropanol or acetonitrile) + water co-solvent mixtures, *Journal of*

Molecular Liquids 242 (2017) 618-624. <https://doi.org/10.1016/j.molliq.2017.07.071>

[54] N. Gheitasi, A.H. Nazari, A. Haghtalab, Thermodynamic Modeling and Solubility Measurement of Cetirizine Hydrochloride and Deferiprone in Pure Solvents of Acetonitrile, Ethanol, Acetic Acid, Sulfolane, and Ethyl Acetate and Their Mixtures, Journal of Chemical & Engineering Data 64 (2019) 5486-5496. <https://doi.org/10.1021/acs.jced.9b00620>

[55] H. Zhang, Q. Yin, Z. Liu, J. Gong, Y. Bao, M. Zhang, H. Hao, B. Hou, C. Xie, Measurement and correlation of solubility of dodecanedioic acid in different pure solvents from T=(288.15 to 323.15)K, The Journal of Chemical Thermodynamics 68 (2014) 270-274. <https://doi.org/10.1016/j.jct.2013.09.012>

[56] Q. Xia, S.-N. Chen, Y.-S. Chen, M.-S. Zhang, F.-B. Zhang, G.-L. Zhang, Solubility of decanedioic acid in binary solvent mixtures, Fluid Phase Equilibria 304 (2011) 105-109. <https://doi.org/10.1016/j.fluid.2011.02.018>

[57] M. Abbasi, J. Vaez-Gharamaleki, R. Fazeli-Bakhtiyari, F. Martinez, A. Jouyban, Prediction of deferiprone solubility in some non-aqueous binary solvent mixtures at various temperatures, Journal of Molecular Liquids 203 (2015) 16-19. <https://doi.org/10.1016/j.molliq.2014.12.034>

[58] E. Mohamadian, S. Hamidi, F. Martínez, A. Jouyban, Solubility prediction of deferiprone in *N*-methyl-2-pyrrolidone + ethanol mixtures at various temperatures using a minimum number of experimental data, Physics and Chemistry of Liquids (2017) 1-12. <https://doi.org/10.1080/00319104.2017.1283691>

[59] S. Radmand, H. Rezaei, H. Zhao, E. Rahimpour, A. Jouyban, Solubility and thermodynamic study of deferiprone in propylene glycol and ethanol mixture, BMC Chem 17 (2023) 37-37. <https://doi.org/10.1186/s13065-023-00950-1>

[60] H. Rezaei, E. Rahimpour, F. Martinez, A. Jouyban, Measurement and correlation of solubility data for deferiprone in propylene glycol and 2-propanol at different temperatures, Heliyon 9 (2023) e17402-e17402. <https://doi.org/10.1016/j.heliyon.2023.e17402>

[61] F.-x. Chen, M.-r. Zhao, B.-z. Ren, C.-r. Zhou, F.-f. Peng, Solubility of diosgenin in different solvents, The Journal of Chemical Thermodynamics 47 (2012) 341-346. <https://doi.org/10.1016/j.jct.2011.11.009>

[62] F. Chen, M. Zhao, L. Feng, B. Ren, Measurement and Correlation for Solubility of Diosgenin in Some Mixed Solvents, Chinese Journal of Chemical Engineering 22 (2014) 170-176. [https://doi.org/10.1016/s1004-9541\(14\)60023-9](https://doi.org/10.1016/s1004-9541(14)60023-9)

[63] K. Moodley, J. Rarey, D. Ramjugernath, Experimental solubility of diosgenin and estriol in various solvents between T=(293.2–328.2)K, The Journal of Chemical Thermodynamics 106 (2017) 199-207. <https://doi.org/10.1016/j.jct.2016.11.017>

[64] R. Li, L. Fu, J. Zhang, W. Wang, X. Chen, J. Zhao, D. Han, Solid-liquid equilibrium and thermodynamic properties of dipyridamole form II in pure solvents and mixture of (N-methyl pyrrolidone + isopropanol), The Journal of Chemical Thermodynamics 142 (2020) 105981. <https://doi.org/10.1016/j.jct.2019.105981>

[65] S. Wang, Y. Chen, T. Gong, W. Dong, G. Wang, H. Li, S. Wu, Solid-liquid equilibrium behavior and thermodynamic analysis of dipyridamole in pure and binary solvents from 293.15 K to 328.15 K, Journal of Molecular Liquids 275 (2019) 8-17. <https://doi.org/10.1016/j.molliq.2018.11.026>

[66] M. Li, S. Liu, S. Li, Y. Yang, Y. Cui, J. Gong, Determination and Correlation of Dipyridamole p-Toluene Sulfonate Solubility in Seven Alcohol Solvents and Three Binary Solvents, Journal of Chemical & Engineering Data 63 (2017) 208-216. <https://doi.org/10.1021/acs.jced.7b00825>

- [67] S. Kandi, A.L. Charles, Measurement, correlation, and thermodynamic properties for solubilities of bioactive compound (–)-epicatechin in different pure solvents at 298.15 K to 338.15 K, *Journal of Molecular Liquids* 264 (2018) 269-274.  
<https://doi.org/10.1016/j.molliq.2018.05.054>
- [68] L. Ning, X. Gong, P. Li, X. Chen, H. Wang, J. Xu, Measurement and correlation of the solubility of estradiol and estradiol-urea co-crystal in fourteen pure solvents at temperatures from 273.15 K to 318.15 K, *Journal of Molecular Liquids* 304 (2020) 112599.  
<https://doi.org/10.1016/j.molliq.2020.112599>
- [69] X. Hu, Y. Gong, Z. Cao, Z. Huang, J. Sha, Y. Li, T. Li, B. Ren, Solubility, Hansen solubility parameter and thermodynamic properties of etodolac in twelve organic pure solvents at different temperatures, *Journal of Molecular Liquids* 316 (2020) 113779.  
<https://doi.org/10.1016/j.molliq.2020.113779>
- [70] X. Hu, Y. Tian, Z. Cao, J. Sha, Z. Huang, Y. Li, T. Li, B. Ren, Solubility measurement, Hansen solubility parameter and thermodynamic modeling of etodolac in four binary solvents from 278.15 K to 323.15 K, *Journal of Molecular Liquids* 318 (2020) 114155.  
<https://doi.org/10.1016/j.molliq.2020.114155>
- [71] P.B. Rath, M. Kale, J. Soleymani, A. Jouyban, Solubility of Etoricoxib in Aqueous Solutions of Glycerin, Methanol, Polyethylene Glycols 200, 400, 600, and Propylene Glycol at 298.2 K, *Journal of Chemical & Engineering Data* 63 (2018) 321-330.  
<https://doi.org/10.1021/acs.jced.7b00709>
- [72] N. Torres, B. Escalera, F. Martínez, M.Á. Peña, Thermodynamic Analysis of Etoricoxib in Amphiprotic and Amphiprotic: Aprotic Solvent Mixtures at Several Temperatures, *Journal of Solution Chemistry* 49 (2020) 272-288. <https://doi.org/10.1007/s10953-020-00953-9>
- [73] Z. Yang, D. Shao, G. Zhou, Analysis of solubility parameters of fenbendazole in pure and mixed solvents and evaluation of thermodynamic model, *The Journal of Chemical Thermodynamics* 140 (2020) 105876. <https://doi.org/10.1016/j.jct.2019.07.018>
- [74] J. Zhang, C. Huang, J. Chen, R. Xu, Equilibrium Solubility Determination and Modeling of Fenbendazole in Cosolvent Mixtures at (283.15–328.15) K, *Journal of Chemical & Engineering Data* 64 (2019) 4095-4102. <https://doi.org/10.1021/acs.jced.9b00471>
- [75] M. Kuhs, M. Svärd, Å.C. Rasmuson, Thermodynamics of fenoxycarb in solution, *The Journal of Chemical Thermodynamics* 66 (2013) 50-58. <https://doi.org/10.1016/j.jct.2013.06.007>
- [76] M. Valavi, M. Ukrainczyk, M.R. Dehghani, Prediction of solubility of active pharmaceutical ingredients by semi- predictive Flory Huggins/Hansen model, *Journal of Molecular Liquids* 246 (2017) 166-172. <https://doi.org/10.1016/j.molliq.2017.09.073>
- [77] K. Bhesaniya, K. Nandha, S. Baluja, Thermodynamics of Fluconazole Solubility in Various Solvents at Different Temperatures, *Journal of Chemical & Engineering Data* 59 (2014) 649-652.  
<https://doi.org/10.1021/jce4010257>
- [78] S. Akay, B. Kaya, F. Martínez, Solubility of fluconazole in (ethanol + water) mixtures: Determination, correlation, dissolution thermodynamics and preferential solvation, *Journal of Molecular Liquids* 333 (2021) 115987. <https://doi.org/10.1016/j.molliq.2021.115987>
- [79] S. Watterson, S. Hudson, M. Svärd, Å.C. Rasmuson, Thermodynamics of fenofibrate and solubility in pure organic solvents, *Fluid Phase Equilibria* 367 (2014) 143-150.  
<https://doi.org/10.1016/j.fluid.2014.01.029>
- [80] H. Sun, B. Liu, P. Liu, J. Zhang, Y. Wang, Solubility of Fenofibrate in Different Binary Solvents: Experimental Data and Results of Thermodynamic Modeling, *Journal of Chemical & Engineering Data* 61 (2016) 3177-3183. <https://doi.org/10.1021/acs.jced.6b00268>

- [81] S. Wang, N. Chen, Y. Qu, Solubility of Florfenicol in Different Solvents at Temperatures from (278 to 318) K, *Journal of Chemical & Engineering Data* 56 (2011) 638-641. <https://doi.org/10.1021/je1008284>
- [82] P. Zhang, C. Zhang, R. Zhao, Y. Wan, Z. Yang, R. He, Q. Chen, T. Li, B. Ren, Measurement and Correlation of the Solubility of Florfenicol Form A in Several Pure and Binary Solvents, *Journal of Chemical & Engineering Data* 63 (2018) 2046-2055. <https://doi.org/10.1021/acs.jced.8b00043>
- [83] Y. Lou, Y. Wang, Y. Li, M. He, N. Su, R. Xu, X. Meng, B. Hou, C. Xie, Thermodynamic equilibrium and cosolvency of florfenicol in binary solvent system, *Journal of Molecular Liquids* 251 (2018) 83-91. <https://doi.org/10.1016/j.molliq.2017.12.046>
- [84] X. Zhang, P. Cui, Q. Yin, L. Zhou, Measurement and Correlation of the Solubility of Florfenicol in Four Binary Solvent Mixtures from  $T = (278.15 \text{ to } 318.15) \text{ K}$ , *Crystals* 12 (2022) 1176. <https://doi.org/10.3390/cryst12081176>
- [85] R.I. Zorrilla-Veloz, T. Stelzer, V. López-Mejías, Measurement and Correlation of the Solubility of 5-Fluorouracil in Pure and Binary Solvents, *J Chem Eng Data* 63 (2018) 3809-3817. <https://doi.org/10.1021/acs.jced.8b00425>
- [86] Y. Wu, J. Wu, J. Wang, J. Gao, Effect of Solvent Properties and Composition on the Solubility of Ganciclovir Form I, *Journal of Chemical & Engineering Data* 64 (2019) 1501-1507. <https://doi.org/10.1021/acs.jced.8b01080>
- [87] R. Li, H. Yan, Z. Wang, J. Gong, Correlation of Solubility and Prediction of the Mixing Properties of Ginsenoside Compound K in Various Solvents, *Industrial & Engineering Chemistry Research* 51 (2012) 8141-8148. <https://doi.org/10.1021/ie300945p>
- [88] M.A.A. Fakhree, S. Ahmadian, V. Panahi-Azar, W.E. Acree, A. Jouyban, Solubility of 2-Hydroxybenzoic Acid in Water, 1-Propanol, 2-Propanol, and 2-Propanone at (298.2 to 338.2) K and Their Aqueous Binary Mixtures at 298.2 K, *Journal of Chemical & Engineering Data* 57 (2012) 3303-3307. <https://doi.org/10.1021/je300980k>
- [89] R. Cañadas, M. González-Miquel, E.J. González, I. Díaz, M. Rodríguez, Evaluation of bio-based solvents for phenolic acids extraction from aqueous matrices, *Journal of Molecular Liquids* 338 (2021) 116930. <https://doi.org/10.1016/j.molliq.2021.116930>
- [90] K. Moodley, J. Rarey, D. Ramjugernath, Experimental solubility data for prednisolone and hydrocortisone in various solvents between (293.2 and 328.2) K by employing combined DTA/TGA, *Journal of Molecular Liquids* 240 (2017) 303-312. <https://doi.org/10.1016/j.molliq.2017.05.076>
- [91] L. Jia, J. Yang, P. Cui, D. Wu, S. Wang, B. Hou, L. Zhou, Q. Yin, Uncovering solubility behavior of Prednisolone form II in eleven pure solvents by thermodynamic analysis and molecular simulation, *Journal of Molecular Liquids* 342 (2021) 117376. <https://doi.org/10.1016/j.molliq.2021.117376>
- [92] H.S.M. Ali, P. York, N. Blagden, S. Soltanpour, W.E. Acree, A. Jouyban, Solubility of Budesonide, Hydrocortisone, and Prednisolone in Ethanol + Water Mixtures at 298.2 K, *Journal of Chemical & Engineering Data* 55 (2009) 578-582. <https://doi.org/10.1021/je900376r>
- [93] Y. Liu, Y. Wang, Y. Liu, S. Xu, M. Chen, S. Du, J. Gong, Solubility of L-histidine in different aqueous binary solvent mixtures from 283.15 K to 318.15 K with experimental measurement and thermodynamic modelling, *The Journal of Chemical Thermodynamics* 105 (2017) 1-14. <https://doi.org/10.1016/j.jct.2016.09.039>
- [94] F. Zhang, Commentary on the “Solubility of l-histidine in different aqueous binary solvent mixtures from 283.15 K to 318.15 K with experimental measurement and thermodynamic

modelling”, The Journal of Chemical Thermodynamics 124 (2018) 98-100.

<https://doi.org/10.1016/j.jct.2018.04.012>

[95] Y. Chen, X. Xu, L. Xie, Thermodynamic parameters on corresponding solid-liquid equilibrium of hydroxyapatite in pure and mixture organic solvents, Journal of Molecular Liquids 229 (2017) 189-197. <https://doi.org/10.1016/j.molliq.2016.12.082>

[96] J. Qiu, H. Huang, H. He, H. Liu, S. Hu, J. Han, Y. Guo, P. Wang, Measurement and Correlation of *trans*-4-Hydroxy-*L*-proline Solubility in Sixteen Individual Solvents and a Water + Acetonitrile Binary Solvent System, Journal of Chemical & Engineering Data 66 (2020) 575-587. <https://doi.org/10.1021/acs.jced.0c00794>

[97] Y. Zhu, H. Yang, Z. Si, X. Zhang, Solubility and thermodynamics of *L*-hydroxyproline in water and (methanol, ethanol, *n*-propanol) binary solvent mixtures, Journal of Molecular Liquids 298 (2020) 112043. <https://doi.org/10.1016/j.molliq.2019.112043>

[98] K. Wu, Y. Li, Solubility and solution thermodynamics of isobutyramide in 15 pure solvents at temperatures from 273.15 to 324.75 K, Journal of Molecular Liquids 311 (2020) 113294. <https://doi.org/10.1016/j.molliq.2020.113294>

[99] S. Soltanpour, A. Jouyban, Solubility of Acetaminophen and Ibuprofen in Binary and Ternary Mixtures of Polyethylene Glycol 600, Ethanol and Water, Chemical and Pharmaceutical Bulletin 58 (2010) 219-224. <https://doi.org/10.1248/cpb.58.219>

[100] S. Wang, Z. Song, J. Wang, Y. Dong, M. Wu, Solubilities of Ibuprofen in Different Pure Solvents, Journal of Chemical & Engineering Data 55 (2010) 5283-5285. <https://doi.org/10.1021/je100255z>

[101] M.A. Filippa, E.I. Gasull, Ibuprofen solubility in pure organic solvents and aqueous mixtures of cosolvents: Interactions and thermodynamic parameters relating to the solvation process, Fluid Phase Equilibria 354 (2013) 185-190. <https://doi.org/10.1016/j.fluid.2013.06.032>

[102] A. Rashid, E.T. White, T. Howes, J.D. Litster, I. Marziano, Effect of Solvent Composition and Temperature on the Solubility of Ibuprofen in Aqueous Ethanol, Journal of Chemical & Engineering Data 59 (2014) 2699-2703. <https://doi.org/10.1021/je400819z>

[103] Z. Chen, J. Zhai, X. Liu, S. Mao, L. Zhang, S. Rohani, J. Lu, Solubility measurement and correlation of the form A of ibrutinib in organic solvents from 278.15 to 323.15 K, The Journal of Chemical Thermodynamics 103 (2016) 342-348. <https://doi.org/10.1016/j.jct.2016.08.034>

[104] F. Shakeel, M. Iqbal, E. Ezzeldin, N. Haq, Thermodynamics of solubility of ibrutinib in ethanol+water cosolvent mixtures at different temperatures, Journal of Molecular Liquids 209 (2015) 461-464. <https://doi.org/10.1016/j.molliq.2015.06.016>

[105] X. Wang, D. Zhang, S. Liu, Y. Chen, L. Jia, S. Wu, Thermodynamic Study of Solubility for Imatinib Mesylate in Nine Monosolvents and Two Binary Solvent Mixtures from 278.15 to 318.15 K, Journal of Chemical & Engineering Data 63 (2018) 4114-4127. <https://doi.org/10.1021/acs.jced.8b00551>

[106] Z. Yang, D. Shao, G. Zhou, Solubility profile of imatinib in pure and mixed solvents and calculation of thermodynamic properties, The Journal of Chemical Thermodynamics 144 (2020) 106031. <https://doi.org/10.1016/j.jct.2019.106031>

[107] L. Yang, Y. Zhang, J. Cheng, C. Yang, Solubility and thermodynamics of polymorphic indomethacin in binary solvent mixtures, Journal of Molecular Liquids 295 (2019) 111717. <https://doi.org/10.1016/j.molliq.2019.111717>

[108] S. Hellstén, H. Qu, M. Louhi-Kultanen, Screening of Binary Solvent Mixtures and Solvate Formation of Indomethacin, Chemical Engineering & Technology 34 (2011) 1667-1674. <https://doi.org/10.1002/ceat.201100072>

- [109] M.A. Ruidiaz, D.R. Delgado, F. Martínez, Indomethacin solubility estimation in 1,4-dioxane + water mixtures by the extended hildebrand solubility approach, *Química Nova* 34 (2011) 1569-1574. <https://doi.org/10.1590/s0100-40422011000900016>
- [110] M.A. Kalam, S. Alshehri, A. Alshamsan, A. Haque, F. Shakeel, Solid liquid equilibrium of an antifungal drug itraconazole in different neat solvents: Determination and correlation, *Journal of Molecular Liquids* 234 (2017) 81-87. <https://doi.org/10.1016/j.molliq.2017.03.054>
- [111] Q. Dong, S. Yu, X. Wang, S. Ding, E. Li, Y. Cai, F. Xue, Solubility Measurement and Correlation of Itraconazole Hydroxy Isobutyltriazolone in Four Kinds of Binary Solvent Mixtures with Temperature from 283.15 to 323.15 K, *ACS Omega* 8 (2023) 39390-39400. <https://doi.org/10.1021/acsomega.3c04987>
- [112] S. Soltanpour, V. Nazemi, Solubility of Ketoconazole in Binary and Ternary Solvents of Polyethylene Glycols 200, 400 or 600 with Ethanol and Water at 298.2 K. Data Report and Analysis, *Journal of Solution Chemistry* 47 (2018) 65-79. <https://doi.org/10.1007/s10953-017-0708-6>
- [113] A. Jouyban, W.E. Acree, F. Martínez, Dissolution thermodynamics and preferential solvation of ketoconazole in some {ethanol (1) + water (2)} mixtures, *Journal of Molecular Liquids* 313 (2020) 113579. <https://doi.org/10.1016/j.molliq.2020.113579>
- [114] V. Jouyban-Gharamaleki, A. Jouyban, F. Martinez, H. Zhao, E. Rahimpour, A laser monitoring technique for solubility study of ketoconazole in propylene glycol and 2-propanol mixtures at various temperatures, *Journal of Molecular Liquids* 320 (2020) 114444. <https://doi.org/10.1016/j.molliq.2020.114444>
- [115] S. Zadaliasghar, A. Jouyban, F. Martinez, M. Barzegar-Jalali, E. Rahimpour, Solubility of ketoconazole in the binary mixtures of 2-propanol and water at different temperatures, *Journal of Molecular Liquids* 300 (2020) 112259. <https://doi.org/10.1016/j.molliq.2019.112259>
- [116] S. Pabba, A. Kumari, M.G. Ravuri, P.K. Thella, B. Satyavathi, K. Shah, S. Kundu, S.K. Bhargava, Experimental determination and modelling of the co-solvent and antisolvent behaviour of binary systems on the dissolution of pharma drug; L-aspartic acid and thermodynamic correlations, *Journal of Molecular Liquids* 314 (2020) 113657. <https://doi.org/10.1016/j.molliq.2020.113657>
- [117] R.S. Rani, G.N. Rao, Stability of binary complexes of L-aspartic acid in dioxan–water mixtures, *Bulletin of the Chemical Society of Ethiopia* 27 (2013). <https://doi.org/10.4314/bcse.v27i3.5>
- [118] A. Li, Z. Si, Y. Yan, X. Zhang, Solubility and thermodynamic properties of hydrate lenalidomide in phosphoric acid solution, *Journal of Molecular Liquids* 330 (2021) 115446. <https://doi.org/10.1016/j.molliq.2021.115446>
- [119] R. Li, L. Liu, A. Khan, C. Li, Z. He, J. Zhao, D. Han, Effect of Cosolvents on the Solubility of Lenalidomide and Thermodynamic Model Correlation of Data, *Journal of Chemical & Engineering Data* 64 (2019) 4272-4279. <https://doi.org/10.1021/acs.jced.9b00331>
- [120] Q. Yu, X. Ma, L. Xu, Solubility, dissolution enthalpy and entropy of l-glutamine in mixed solvents of ethanol+water and acetone+water, *Thermochimica Acta* 558 (2013) 6-9. <https://doi.org/10.1016/j.tca.2013.02.007>
- [121] V.I. Smirnov, V.G. Badelin, Similarity and differences of the thermochemical characteristics of l-glutamine dissolution in aqueous solutions of some acetamides and formamides at T = 298.15 K, *Journal of Molecular Liquids* 285 (2019) 84-88. <https://doi.org/10.1016/j.molliq.2019.04.099>
- [122] V.I. Smirnov, Thermochemical investigation of L-glutamine dissolution processes in

aqueous co-solvent mixtures of acetonitrile, dioxane, acetone and dimethyl sulfoxide at  $T = 298.15$  K, *The Journal of Chemical Thermodynamics* 150 (2020) 106227.

<https://doi.org/10.1016/j.jct.2020.106227>

[123] K. Gusain, S. Garg, R. Kumar, Solubility Prediction of Pharmaceutical Compounds in Pure Solvent by Different Correlations and Thermodynamic Models, *SSRN Electronic Journal* (2020). <https://doi.org/10.2139/ssrn.3716484>

[124] P. Zhang, Y. Wan, C. Zhang, R. Zhao, J. Sha, Y. Li, T. Li, B. Ren, Solubility and mixing thermodynamic properties of levamisole hydrochloride in twelve pure solvents at various temperatures, *The Journal of Chemical Thermodynamics* 139 (2019) 105882. <https://doi.org/10.1016/j.jct.2019.105882>

[125] P. Zhang, J. Sha, Y. Wan, C. Zhang, T. Li, B. Ren, Apparent thermodynamic analysis and the dissolution behavior of levamisole hydrochloride in three binary solvent mixtures, *Thermochimica Acta* 681 (2019) 178375. <https://doi.org/10.1016/j.tca.2019.178375>

[126] J.M. Jiménez Cruz, C.P. Vlaar, V. López-Mejías, T. Stelzer, Solubility Measurements and Correlation of MBQ-167 in Neat and Binary Solvent Mixtures, *J Chem Eng Data* 66 (2021) 832-839. <https://doi.org/10.1021/acs.jced.0c00908>

[127] R. Li, X. Yin, Y. Jin, X. Chen, B. Zhao, W. Wang, S. Zhong, D. Han, The solubility profile and dissolution thermodynamic properties of minocycline hydrochloride in some pure and mixed solvents at several temperatures, *The Journal of Chemical Thermodynamics* 157 (2021) 106399. <https://doi.org/10.1016/j.jct.2021.106399>

[128] S. Chen, Q. Liu, H. Dou, L. Zhang, L. Pei, R. Huang, G. Shu, Z. Yuan, J. Lin, W. Zhang, G. Peng, Z. Zhong, L. Yin, L. Zhao, H. Fu, Solubility and dissolution thermodynamic properties of Mequindox in binary solvent mixtures, *Journal of Molecular Liquids* 303 (2020) 112619. <https://doi.org/10.1016/j.molliq.2020.112619>

[129] J. Zhang, X. Song, R. Xu, Solubility Determination and Modeling for Milrinone in Binary Solvent Mixtures of Ethanol, Isopropanol, Ethylene Glycol, and  $N,N$ -Dimethylformamide + Water, *Journal of Chemical & Engineering Data* 65 (2020) 4100-4107. <https://doi.org/10.1021/acs.jced.0c00394>

[130] R. Li, Y. Jin, B. Yu, Q. Xu, X. Chen, D. Han, Solubility determination and thermodynamic properties calculation of macitentan in mixtures of ethyl acetate and alcohols, *The Journal of Chemical Thermodynamics* 156 (2021) 106344. <https://doi.org/10.1016/j.jct.2020.106344>

[131] C.P. Mora, F. Martínez, Solubility of naproxen in several organic solvents at different temperatures, *Fluid Phase Equilibria* 255 (2007) 70-77. <https://doi.org/10.1016/j.fluid.2007.03.029>

[132] D.P. Pacheco, F. Martínez, Thermodynamic analysis of the solubility of naproxen in ethanol + water cosolvent mixtures, *Physics and Chemistry of Liquids* 45 (2007) 581-595. <https://doi.org/10.1080/00319100701313862>

[133] M. Mohammadzade, M. Barzegar-Jalali, A. Jouyban, Solubility of naproxen in 2-propanol+water mixtures at various temperatures, *Journal of Molecular Liquids* 206 (2015) 110-113. <https://doi.org/10.1016/j.molliq.2015.01.052>

[134] S. Soltanpour, A.-H. Shekarriz, Naproxen solubility in binary and ternary solvents of polyethylene glycols 200, 400 or 600 with ethanol and water at 298.2 K – experimental data report and modelling, *Physics and Chemistry of Liquids* 53 (2015) 748-762. <https://doi.org/10.1080/00319104.2015.1047450>

[135] E. Mohammadian, A. Jouyban, M. Barzegar-Jalali, W.E. Acree, E. Rahimpour, Solubilization of naproxen: Experimental data and computational tools, *Journal of Molecular*



Liquids 288 (2019) 110985. <https://doi.org/10.1016/j.molliq.2019.110985>

[136] J. Zhang, C. Huang, R. Xu, Solubility Determination and Mathematical Modeling of Nicorandil in Several Aqueous Cosolvent Systems at Temperature Ranges of 278.15–323.15 K, *Journal of Chemical & Engineering Data* 65 (2020) 4063–4070.

<https://doi.org/10.1021/acs.jced.0c00370>

[137] M. Y, Preferential Solvation of Drugs in Binary Solvent Mixtures, *Pharmaceutica Analytica Acta* 08 (2017). <https://doi.org/10.4172/2153-2435.1000537>

[138] W.E. Acree, IUPAC-NIST Solubility Data Series. 102. Solubility of Nonsteroidal Anti-inflammatory Drugs (NSAIDs) in Neat Organic Solvents and Organic Solvent Mixtures, *Journal of Physical and Chemical Reference Data* 43 (2014). <https://doi.org/10.1063/1.4869683>

[139] M.K. Anwer, M. Mohammad, F. Fatima, S.M. Alshahrani, M.F. Aldawsari, A. Alalaiwe, R. Al-Shdefat, F. Shakeel, Solubility, solution thermodynamics and molecular interactions of osimertinib in some pharmaceutically useful solvents, *Journal of Molecular Liquids* 284 (2019) 53–58. <https://doi.org/10.1016/j.molliq.2019.03.128>

[140] P. Cysewski, T. Jeliński, M. Przybyłek, W. Nowak, M. Olczak, Solubility Characteristics of Acetaminophen and Phenacetin in Binary Mixtures of Aqueous Organic Solvents: Experimental and Deep Machine Learning Screening of Green Dissolution Media, *Pharmaceutics* 14 (2022) 2828. <https://doi.org/10.3390/pharmaceutics14122828>

[141] B. Calvo, I. Collado, E.A. Cepeda, Solubilities of Palmitic Acid in Pure Solvents and Its Mixtures, *Journal of Chemical & Engineering Data* 54 (2008) 64–68.

<https://doi.org/10.1021/je8005979>

[142] A.B. Gonçalves Bonassoli, G. Oliveira, F.H. Bordón Sosa, M.P. Rolemberg, M.A. Mota, R.C. Basso, L. Igarashi-Mafra, M.R. Mafra, Solubility Measurement of Lauric, Palmitic, and Stearic Acids in Ethanol, *N*-Propanol, and 2-Propanol Using Differential Scanning Calorimetry, *Journal of Chemical & Engineering Data* 64 (2019) 2084–2092.

<https://doi.org/10.1021/acs.jced.8b01044>

[143] G. Oliveira, A.B.G. Bonassoli, M.P. Rolemberg, M.A. Mota, R.C. Basso, R.d.P. Soares, L. Igarashi-Mafra, M.R. Mafra, Water Effect on Solubilities of Lauric and Palmitic Acids in Ethanol and 2-Propanol Determined by Differential Scanning Calorimetry, *Journal of Chemical & Engineering Data* 66 (2021) 2366–2373. <https://doi.org/10.1021/acs.jced.0c00805>

[144] A. Hatefi, A. Jouyban, E. Mohammadian, W.E. Acree, E. Rahimpour, Prediction of paracetamol solubility in cosolvency systems at different temperatures, *Journal of Molecular Liquids* 273 (2019) 282–291. <https://doi.org/10.1016/j.molliq.2018.10.031>

[145] G.P. Assis, R.H.L. Garcia, S. Derenzo, A. Bernardo, Solid-liquid equilibrium of paracetamol in water-ethanol and water-propylene glycol mixtures, *Journal of Molecular Liquids* 323 (2021) 114617. <https://doi.org/10.1016/j.molliq.2020.114617>

[146] Studies on the Interactions of Paracetamol in Water and Binary Solvent Mixtures at T = (298.15–313.15) K: Viscometric and Surface Tension Approach, *Biointerface Research in Applied Chemistry* 12 (2021) 2776–2786. <https://doi.org/10.33263/briac123.27762786>

[147] R. Li, B. Zhao, X. Chen, J. Zhang, Z. Liu, X. Zhu, D. Han, Solubility and apparent thermodynamic analysis of pomalidomide in (acetone + ethanol/isopropanol) and (ethyl acetate + ethanol/isopropanol) and its correlation with thermodynamic model, *The Journal of Chemical Thermodynamics* 154 (2021) 106345. <https://doi.org/10.1016/j.jct.2020.106345>

[148] M. Padervand, S. Naseri, H.C. Boroujeni, Preferential solvation of pomalidomide, an anticancer compound, in some binary mixed solvents at 298.15 K, *Chinese Journal of Chemical Engineering* 28 (2020) 2626–2633. <https://doi.org/10.1016/j.cjche.2020.07.010>

- [149] V. Aniya, D. De, A.M. Mohammed, P.K. Thella, B. Satyavathi, Measurement and Modeling of Solubility of *para-tert*-Butylbenzoic Acid in Pure and Mixed Organic Solvents at Different Temperatures, *Journal of Chemical & Engineering Data* 62 (2017) 1411-1421. <https://doi.org/10.1021/acs.jced.6b00965>
- [150] A. Kumari, S. Kadakanchi, R. Tangirala, P.K. Thella, B. Satyavathi, Measurement and Modeling of Solid–Liquid Equilibrium of *para-tert*-Butylbenzoic Acid in Acetic Acid/Methanol + Water and Acetic Acid + *para-tert*-Butyltoluene Binary Systems at Various Temperatures, *Journal of Chemical & Engineering Data* 62 (2016) 87-95. <https://doi.org/10.1021/acs.jced.6b00464>
- [151] G.T. Castro, M.A. Filippa, C.M. Peralta, M.V. Davin, M.C. Almandoz, E.I. Gasull, Solubility and Preferential Solvation of Piroxicam in Neat Solvents and Binary Systems, *Zeitschrift für Physikalische Chemie* 232 (2017) 257-280. <https://doi.org/10.1515/zpch-2017-0946>
- [152] S. Soltanpour, A. Gharagozlu, Piroxicam Solubility in Binary and Ternary Solvents of Polyethylene Glycols 200 or 400 with Ethanol and Water at 298.2 K: Experimental Data Report and Modeling, *Journal of Solution Chemistry* 44 (2015) 1407-1423. <https://doi.org/10.1007/s10953-015-0353-x>
- [153] A. Mabhoot, A. Jouyban, Solubility of Sodium Phenytoin in Propylene Glycol + Water Mixtures in the Presence of B-Cyclodextrin, *Pharmaceutical Sciences* 21 (2015) 152-156. <https://doi.org/10.1517/ps.2015.30>
- [154] S. Khajir, A. Shayanfar, W.E. Acree, A. Jouyban, Effects of N-methylpyrrolidone and temperature on phenytoin solubility, *Journal of Molecular Liquids* 285 (2019) 58-61. <https://doi.org/10.1016/j.molliq.2019.04.049>
- [155] H. Rezaei, H. Rezaei, E. Rahimpour, F. Martinez, A. Jouyban, Solubility profile of phenytoin in the mixture of 1-propanol and water at different temperatures, *Journal of Molecular Liquids* 334 (2021) 115936. <https://doi.org/10.1016/j.molliq.2021.115936>
- [156] A. Aydi, C.A. Claumann, A. Wüst Zibetti, M. Abderrabba, Differential Scanning Calorimetry Data and Solubility of Rosmarinic Acid in Different Pure Solvents and in Binary Mixtures (Methyl Acetate + Water) and (Ethyl Acetate + Water) from 293.2 to 313.2 K, *Journal of Chemical & Engineering Data* 61 (2016) 3718-3723. <https://doi.org/10.1021/acs.jced.6b00008>
- [157] A. Wüst Zibetti, A. Aydi, C.A. Claumann, A. Eladeb, M. Adberraba, Correlation of solubility and prediction of the mixing properties of rosmarinic acid in different pure solvents and in binary solvent mixtures of ethanol + water and methanol + water from (293.2 to 318.2) K, *Journal of Molecular Liquids* 216 (2016) 370-376. <https://doi.org/10.1016/j.molliq.2016.01.061>
- [158] X. Li, M. Wang, C. Du, Y. Cong, H. Zhao, Preferential solvation of rosmarinic acid in binary solvent mixtures of ethanol + water and methanol + water according to the inverse Kirkwood–Buff integrals method, *Journal of Molecular Liquids* 240 (2017) 56-64. <https://doi.org/10.1016/j.molliq.2017.05.055>
- [159] E.-S. Ha, S.-K. Lee, J.-S. Jeong, W.-Y. Sim, J.-I. Yang, J.-S. Kim, M.-S. Kim, Solvent effect and solubility modeling of rebamipide in twelve solvents at different temperatures, *Journal of Molecular Liquids* 288 (2019) 111041. <https://doi.org/10.1016/j.molliq.2019.111041>
- [160] D. Mealey, M. Svärd, Å.C. Rasmuson, Thermodynamics of risperidone and solubility in pure organic solvents, *Fluid Phase Equilibria* 375 (2014) 73-79. <https://doi.org/10.1016/j.fluid.2014.04.028>
- [161] L. Lange, S. Heisel, G. Sadowski, Predicting the Solubility of Pharmaceutical Cocrystals in Solvent/Anti-Solvent Mixtures, *Molecules* 21 (2016) 593.

<https://doi.org/10.3390/molecules21050593>

- [162] K. Mahali, P.S. Guin, S. Roy, B.K. Dolui, Solubility and solute–solvent interaction phenomenon of succinic acid in aqueous ethanol mixtures, *Journal of Molecular Liquids* 229 (2017) 172–177. <https://doi.org/10.1016/j.molliq.2016.12.042>
- [163] X. Sheng, W. Luo, Q. Wang, Determination and Correlation for the Solubilities of Succinic Acid in Cyclohexanol + Cyclohexanone + Cyclohexane Solvent Mixtures, *Journal of Chemical & Engineering Data* 63 (2018) 801–811. <https://doi.org/10.1021/acs.jced.7b00956>
- [164] H. Matsuda, K. Kaburagi, S. Matsumoto, K. Kurihara, K. Tochigi, K. Tomono, Solubilities of Salicylic Acid in Pure Solvents and Binary Mixtures Containing Cosolvent, *Journal of Chemical & Engineering Data* 54 (2008) 480–484. <https://doi.org/10.1021/jc800475d>
- [165] A.W. Vieira, G. Molina, A.B. Mageste, G.D. Rodrigues, L.R. de Lemos, Partitioning of salicylic and acetylsalicylic acids by aqueous two-phase systems: Mechanism aspects and optimization study, *Journal of Molecular Liquids* 296 (2019) 111775. <https://doi.org/10.1016/j.molliq.2019.111775>
- [166] S. Akay, B. Kayan, M.Á. Peña, A. Jouyban, F. Martínez, Solubility of Salicylic Acid in Some (Ethanol + Water) Mixtures at Different Temperatures: Determination, Correlation, Thermodynamics and Preferential Solvation, *International Journal of Thermophysics* 44 (2023). <https://doi.org/10.1007/s10765-023-03224-z>
- [167] C.-L. Zhang, B.-Y. Li, Y. Wang, Solubilities of Sulfadiazine in Methanol, Ethanol, 1-Propanol, 2-Propanol, Acetone, and Chloroform from (294.15 to 318.15) K, *Journal of Chemical & Engineering Data* 55 (2010) 2338–2339. <https://doi.org/10.1021/jc900742p>
- [168] D.R. Delgado, F. Martínez, Preferential solvation of sulfadiazine, sulfamerazine and sulfamethazine in ethanol+water solvent mixtures according to the IKBI method, *Journal of Molecular Liquids* 193 (2014) 152–159. <https://doi.org/10.1016/j.molliq.2013.12.021>
- [169] M. del Mar Muñoz, D.R. Delgado, M.Á. Peña, A. Jouyban, F. Martínez, Solubility and preferential solvation of sulfadiazine, sulfamerazine and sulfamethazine in propylene glycol+water mixtures at 298.15K, *Journal of Molecular Liquids* 204 (2015) 132–136. <https://doi.org/10.1016/j.molliq.2015.01.047>
- [170] D.M. Jiménez, Z.J. Cárdenas, F. Martínez, Solubility and solution thermodynamics of sulfadiazine in polyethylene glycol 400 + water mixtures, *Journal of Molecular Liquids* 216 (2016) 239–245. <https://doi.org/10.1016/j.molliq.2015.12.114>
- [171] I.P. Osorio, F. Martínez, M.A. Peña, A. Jouyban, W.E. Acree, Solubility, dissolution thermodynamics and preferential solvation of sulfadiazine in (N-methyl-2-pyrrolidone + water) mixtures, *Journal of Molecular Liquids* 330 (2021) 115693. <https://doi.org/10.1016/j.molliq.2021.115693>
- [172] D.R. Delgado, F. Martínez, Solubility and solution thermodynamics of sulfamerazine and sulfamethazine in some ethanol+water mixtures, *Fluid Phase Equilibria* 360 (2013) 88–96. <https://doi.org/10.1016/j.fluid.2013.09.018>
- [173] J.H. Blanco-Márquez, C.P. Ortiz, N.E. Cerquera, F. Martínez, A. Jouyban, D.R. Delgado, Thermodynamic analysis of the solubility and preferential solvation of sulfamerazine in (acetonitrile + water) cosolvent mixtures at different temperatures, *Journal of Molecular Liquids* 293 (2019) 111507. <https://doi.org/10.1016/j.molliq.2019.111507>
- [174] M.S. Vargas-Santana, A.M. Cruz-González, C.P. Ortiz, D.R. Delgado, F. Martínez, M.Á. Peña, W.E. Acree, A. Jouyban, Solubility of sulfamerazine in (ethylene glycol + water) mixtures: Measurement, correlation, dissolution thermodynamics and preferential solvation, *Journal of Molecular Liquids* 337 (2021) 116330. <https://doi.org/10.1016/j.molliq.2021.116330>

- [175] C.P. Ortiz, R.E. Cardenas-Torres, F. Martínez, D.R. Delgado, Solubility of Sulfamethazine in the Binary Mixture of Acetonitrile + Methanol from 278.15 to 318.15 K: Measurement, Dissolution Thermodynamics, Preferential Solvation, and Correlation, *Molecules* 26 (2021) 7588. <https://doi.org/10.3390/molecules26247588>
- [176] H. Wei, N. Gao, L. Dang, Solubility and Thermodynamic Properties of Sulfamethazine–Saccharin Cocrystal in Pure and Binary (Acetonitrile + 2-Propanol) Solvents, *Transactions of Tianjin University* 27 (2020) 460–472. <https://doi.org/10.1007/s12209-020-00255-7>
- [177] M.C. Almandoz, M.I. Sancho, S.E. Blanco, Spectroscopic and DFT study of solvent effects on the electronic absorption spectra of sulfamethoxazole in neat and binary solvent mixtures, *Spectrochimica Acta Part A: Molecular and Biomolecular Spectroscopy* 118 (2014) 112–119. <https://doi.org/10.1016/j.saa.2013.08.060>
- [178] M. Alsubaie, M. Aljohani, A. Erxleben, P. McArdle, Cocrystal Forms of the BCS Class IV Drug Sulfamethoxazole, *Crystal Growth & Design* 18 (2018) 3902–3912. <https://doi.org/10.1021/acs.cgd.8b00216>
- [179] J.C. Serna-Carrizales, A.I. Zárate-Guzmán, A. Aguilar-Aguilar, A. Forgionny, E. Bailón-García, E. Flórez, C.F.A. Gómez-Durán, R. Ocampo-Pérez, Optimization of Binary Adsorption of Metronidazole and Sulfamethoxazole in Aqueous Solution Supported with DFT Calculations, *Processes* 11 (2023) 1009. <https://doi.org/10.3390/pr11041009>
- [180] T. Rosales-García, J.M. Rosete-Barreto, A. Pimentel-Rodas, G. Davila-Ortiz, L.A. Galicia-Luna, Solubility of Squalene and Fatty Acids in Carbon Dioxide at Supercritical Conditions: Binary and Ternary Systems, *Journal of Chemical & Engineering Data* 63 (2017) 69–76. <https://doi.org/10.1021/acs.jced.7b00620>
- [181] S. Wang, Q.-S. Li, M.-G. Su, Solubility of 1*H*-1,2,4-Triazole in Ethanol, 1-Propanol, 2-Propanol, 1,2-Propanediol, Ethyl Formate, Methyl Acetate, Ethyl Acetate, and Butyl Acetate at (283 to 363) K, *Journal of Chemical & Engineering Data* 52 (2007) 856–858. <https://doi.org/10.1021/jc060452c>
- [182] X. Li, C. Du, Y. Cong, H. Zhao, Solubility determination and thermodynamic modelling of 3-amino-1,2,4-triazole in ten organic solvents from  $T = 283.15$  K to  $T = 318.15$  K and mixing properties of solutions, *The Journal of Chemical Thermodynamics* 104 (2017) 189–200. <https://doi.org/10.1016/j.jct.2016.09.033>
- [183] J. Ren, D. Chen, Y. Yu, H. Li, Solubility of dicarbohydrazide bis[3-(5-nitroimino-1,2,4-triazole)] in common pure solvents and binary solvents at different temperatures, *R Soc Open Sci* 6 (2019) 190728–190728. <https://doi.org/10.1098/rsos.190728>
- [184] T.V. Volkova, I.B. Levshin, G.L. Perlovich, New antifungal compound: Solubility thermodynamics and partitioning processes in biologically relevant solvents, *Journal of Molecular Liquids* 310 (2020) 113148. <https://doi.org/10.1016/j.molliq.2020.113148>
- [185] Z. Yang, D. Shao, G. Zhou, Improvement of solubility and analysis thermodynamic properties of  $\beta$  tegafur in pure and mixed organic solvents, *The Journal of Chemical Thermodynamics* 146 (2020) 106090. <https://doi.org/10.1016/j.jct.2020.106090>
- [186] J. Zhang, H. Zhang, R. Xu, Solubility Determination and Modeling for Tirofiban in Several Mixed Solvents at 278.15–323.15 K, *Journal of Chemical & Engineering Data* 65 (2020) 4071–4078. <https://doi.org/10.1021/acs.jced.0c00371>
- [187] E.V. Ivanov, D.V. Batov, Enthalpy-related parameters of interaction of simplest  $\alpha$ -amino acids with the pharmaceutical mebicar (N-tetramethylglycoluril) in water at 298.15 K, *The Journal of Chemical Thermodynamics* 128 (2019) 159–163. <https://doi.org/10.1016/j.jct.2018.08.022>

- [188] N. Zhang, S. Li, H. Yang, M. Li, Y. Yang, W. Tang, Measurement and Correlation of the Solubility of Tetramethylpyrazine in Nine Monosolvents and Two Binary Solvent Systems, *Journal of Chemical & Engineering Data* 64 (2019) 995-1006. <https://doi.org/10.1021/acs.jced.8b00888>
- [189] S.V. Blokhina, A.V. Sharapova, M.V. Ol'khovich, I.B. Levshin, G.L. Perlovich, Solid–liquid phase equilibrium and thermodynamic analysis of novel thiazolidine-2,4-dione derivative in different solvents, *Journal of Molecular Liquids* 326 (2021) 115273. <https://doi.org/10.1016/j.molliq.2020.115273>
- [190] O. Elizalde-Solis, M.G. Arenas-Quevedo, F.J. Verónico-Sánchez, R. García-Morales, A. Zúñiga-Moreno, Solubilities of Binary Systems  $\alpha$ -Tocopherol + Capsaicin and  $\alpha$ -Tocopherol + Palmitic Acid in Supercritical Carbon Dioxide, *Journal of Chemical & Engineering Data* 64 (2019) 1948-1955. <https://doi.org/10.1021/acs.jced.8b00996>
- [191] I. Karpiuk, H. Wilczura-Wachnik, A. Myśliński,  $\alpha$ -Tocopherol/AOT/alkane/water system, *Journal of Thermal Analysis and Calorimetry* 131 (2017) 2885-2892. <https://doi.org/10.1007/s10973-017-6769-3>
- [192] A. Rodríguez, M. Trigo, S.P. Aubourg, I. Medina, Optimisation of Low-Toxicity Solvent Employment for Total Lipid and Tocopherol Compound Extraction from Patagonian Squid By-Products, *Foods* 12 (2023) 504. <https://doi.org/10.3390/foods12030504>
- [193] M.V.G. De la Rosa, R. Santiago, J.M. Romero, J. Duconge, J.-C. Monbaliu, V. López-Mejías, T. Stelzer, Solubility Determination and Correlation of Warfarin Sodium 2-Propanol Solvate in Pure, Binary, and Ternary Solvent Mixtures, *J Chem Eng Data* 64 (2019) 1399-1413. <https://doi.org/10.1021/acs.jced.8b00977>
- [194] J. Sun, X. Liu, Z. Fang, S. Mao, L. Zhang, S. Rohani, J. Lu, Solubility Measurement and Simulation of Rivaroxaban (Form I) in Solvent Mixtures from 273.15 to 323.15 K, *Journal of Chemical & Engineering Data* 61 (2015) 495-503. <https://doi.org/10.1021/acs.jced.5b00667>
- [195] G.G. Swinerd, *Orbital Mechanics: Theory and Applications*, T. Logsdon, John Wiley and Sons Limited, Baffins Lane, Chichester, West Sussex PO19 1UD. 1998. The Aeronautical Journal 102 (1998) 210-210. <https://doi.org/10.1017/s0001924000096330>
- [196] C. Reichardt, Empirical Parameters of Solvent Polarity as Linear Free-Energy Relationships, *Angewandte Chemie International Edition in English* 18 (1979) 98-110. <https://doi.org/10.1002/anie.197900981>
- [197] C. Reichardt and T. Welton, *Solvents and Solvent Effects in Organic Chemistry*, Fourth Edition, Wiley-VCH Verlag & Co. KGaA, Weinheim, 2011. <https://doi.org/10.1002/9783527632220>
- [198] Y. Marcus, The use of chemical probes for the characterization of solvent mixtures. Part 2. Aqueous mixtures, *Journal of the Chemical Society, Perkin Transactions 2* (1994) 1751. <https://doi.org/10.1039/p29940001751>
- [199] F. Pasham, M. Jabbari, A. Farajtabar, Solvatochromic Measurement of KAT Parameters and Modeling Preferential Solvation in Green Potential Binary Mixtures of *N*-Formylmorpholine with Water, Alcohols, and Ethyl Acetate, *Journal of Chemical & Engineering Data* 65 (2020) 5458-5466. <https://doi.org/10.1021/acs.jced.0c00589>
- [200] Y. Marcus, Use of chemical probes for the characterization of solvent mixtures. Part 1. Completely non-aqueous mixtures, *Journal of the Chemical Society, Perkin Transactions 2* (1994) 1015. <https://doi.org/10.1039/p29940001015>
- [201] D. Banerjee, A.K. Laha, S. Bagchi, Preferential solvation in mixed binary solvent, *Journal of the Chemical Society, Faraday Transactions 91* (1995) 631.

<https://doi.org/10.1039/ft9959100631>

- [202] C. Ràfols, M. Rosés, E. Bosch, Solute–solvent and solvent–solvent interactions in binary solvent mixtures. Part 5. Preferential solvation of solvatochromic indicators in mixtures of propan-2-ol with hexane, benzene, ethanol and methanol, *Journal of the Chemical Society, Perkin Transactions 2* (1997) 243-248. <https://doi.org/10.1039/a605421h>
- [203] M. Ross, J. Ortega, E. Bosch, Variation of ET(30) polarity and the Kamlet-Taft solvatochromic parameters with composition in alcohol-alcohol mixtures, *Journal of Solution Chemistry* 24 (1995) 51-63. <https://doi.org/10.1007/bf00973049>
- [204] E. Bosch, M. Rosés, K. Herodes, I. Koppel, I. Leito, I. Koppel, V. Taal, Solute-solvent and solvent-solvent interactions in binary solvent mixtures. 2. Effect of temperature on the ET(30) polarity parameter of dipolar hydrogen bond acceptor-hydrogen bond donor mixtures, *Journal of Physical Organic Chemistry* 9 (1996) 403-410. [https://doi.org/10.1002/\(sici\)1099-1395\(199606\)9:6<403::aid-poc799>3.3.co;2-4](https://doi.org/10.1002/(sici)1099-1395(199606)9:6<403::aid-poc799>3.3.co;2-4)
- [205] E. Bosch, F. Rived, M. Rosés, Solute–solvent and solvent–solvent interactions in binary solvent mixtures. Part 4. Preferential solvation of solvatochromic indicators in mixtures of 2-methylpropan-2-ol with hexane, benzene, propan-2-ol, ethanol and methanol, *J. Chem. Soc., Perkin Trans. 2* (1996) 2177-2184. <https://doi.org/10.1039/p29960002177>
- [206] C.L. Yaws, Physical Properties – Inorganic Compounds, in: *The Yaws Handbook of Physical Properties for Hydrocarbons and Chemicals*, Elsevier, 2015, pp. 684-810. <https://doi.org/10.1016/b978-0-12-800834-8.00002-5>
- [207] M. Dizechi, E. Marschall, Viscosity of some binary and ternary liquid mixtures, *Journal of Chemical & Engineering Data* 27 (1982) 358-363. <https://doi.org/10.1021/je00029a039>
- [208] K. Noda, M. Ohashi, K. Ishida, Viscosities and densities at 298.15 K for mixtures of methanol, acetone, and water, *Journal of Chemical & Engineering Data* 27 (1982) 326-328. <https://doi.org/10.1021/je00029a028>
- [209] K. Noda, Y. Aono, K. Ishida, Viscosity and Density of Ethanol-Acetic Acid-Water Mixtures, *Kagaku Kogaku Ronbunshu* 9 (1983) 237-240. <https://doi.org/10.1252/kakoronbunshu.9.237>
- [210] T. Teutenberg, S. Wiese, P. Wagner, J. Gmehling, High-temperature liquid chromatography. Part II: Determination of the viscosities of binary solvent mixtures—Implications for liquid chromatographic separations, *Journal of Chromatography A* 1216 (2009) 8470-8479. <https://doi.org/10.1016/j.chroma.2009.09.075>
- [211] J.M. Bernal-García, A. Guzmán-López, A. Cabrales-Torres, A. Estrada-Baltazar, G.A. Iglesias-Silva, Densities and Viscosities of (*N,N*-Dimethylformamide + Water) at Atmospheric Pressure from (283.15 to 353.15) K, *Journal of Chemical & Engineering Data* 53 (2008) 1024-1027. <https://doi.org/10.1021/je700671t>
- [212] M.d. Carmen Grande, J.A. Juliá, M. García, C.M. Marschoff, On the density and viscosity of (water+dimethylsulphoxide) binary mixtures, *The Journal of Chemical Thermodynamics* 39 (2007) 1049-1056. <https://doi.org/10.1016/j.jct.2006.12.012>
- [213] C.M. Alder, J.D. Hayler, R.K. Henderson, A.M. Redman, L. Shukla, L.E. Shuster, H.F. Sneddon, Updating and further expanding GSK's solvent sustainability guide, *Green Chemistry* 18 (2016) 3879-3890. <https://doi.org/10.1039/c6gc00611f>
